1 **Reclassification of Pterulaceae Corner (Basidiomycota: Agaricales)**

2 **introducing the ant-associated genus *Myrmecopterula* gen. nov.,**

3 ***Phaeopterula* Henn. and the corticioid Radulomycetaceae fam. nov.**

4

5 Caio A. Leal-Dutra<sup>1,5</sup>, Gareth W. Griffith<sup>1</sup>, Maria Alice Neves<sup>2</sup>, David J. McLaughlin<sup>3</sup>, Esther G. McLaughlin<sup>3</sup>,

6 Lina A. Clasen<sup>1</sup> & Bryn T. M. Dentinger<sup>4</sup>

7

8 <sup>1</sup> Institute of Biological, Environmental and Rural Sciences, Aberystwyth University, Aberystwyth, Ceredigion

9 SY23 3DD WALES

10 <sup>2</sup> Micolab, Departamento de Botânica, Centro de Ciências Biológicas, Universidade Federal de Santa Catarina,

11 Florianópolis, Santa Catarina, Brazil

12 <sup>3</sup> Department of Plant and Microbial Biology, University of Minnesota, 1445 Gortner Avenue, St. Paul,

13 Minnesota 55108, USA

14 <sup>4</sup> Natural History Museum of Utah & Biology Department, University of Utah, 301 Wakara Way, Salt Lake

15 City, Utah 84108, USA

16 <sup>5</sup> CAPES Foundation, Ministry of Education of Brazil, P.O. Box 250, Brasília – DF 70040-020, Brazil

17

18 **Author's e-mails in order :**

19 caioboss@gmail.com

20 gwg@aber.ac.uk (\*Corresponding author)

21 maliceneves@gmail.com

22 davem@umn.edu

23 pterula@yahoo.com

24 linaclasen@gmail.com

25 bryn.dentinger@gmail.com

26

27

28

29

30 **ABSTRACT**

31

32 Pterulaceae was formally proposed to group six coralloid and dimitic genera [*Actiniceps* (= *Dimorphocystis*),  
33 *Allantula*, *Deflexula*, *Parapterulicium*, *Pterula* and *Pterulicium*]. Recent molecular studies have shown that  
34 some of the characters currently used in Pterulaceae Corner do not distinguish the genera. *Actiniceps* and  
35 *Parapterulicium* have been removed and a few other resupinate genera were added to the family. However,  
36 none of these studies intended to investigate the relationship between Pterulaceae genera. In this study, we  
37 generated 278 sequences from both newly collected and fungarium samples. Phylogenetic analyses support by  
38 morphological data allowed a reclassification of Pterulaceae where we propose the introduction of  
39 *Myrmecopterula* gen. nov. and Radulomycetaceae fam. nov., the reintroduction of *Phaeopterula*, the  
40 synonymisation of *Deflexula* in *Pterulicium* and 51 new combinations. *Pterula* is rendered polyphyletic  
41 requiring a reclassification; thus, it is split into *Pterula*, *Myrmecopterula* gen. nov., *Pterulicium* and  
42 *Phaeopterula*. *Deflexula* is recovered as paraphyletic alongside several *Pterula* species and *Pterulicium*, and is  
43 sunk into the latter genus. *Phaeopterula* is reintroduced to accommodate species with darker basidiomes. The  
44 neotropical *Myrmecopterula* gen. nov. forms a distinct clade adjacent to *Pterula*, and most members of this  
45 clade are associated with active or inactive attine ant nests. The resupinate genera *Coronicium* and *Merulicium*  
46 are recovered in a strongly supported clade close to *Pterulicium*. The other resupinate genera previously  
47 included in Pterulaceae, and which form basidiomes lacking cystidia and with monomitic hyphal structure  
48 (*Radulomyces*, *Radulotubus* and *Aphanobasidium*), are reclassified into Radulomycetaceae fam. nov.. *Allantula*  
49 is still an enigmatic piece in this puzzle known only from the type specimen that requires molecular  
50 investigation. A key for the genera of Pterulaceae and Radulomycetaceae fam. nov. is provided here.

51

52

53 **KEYWORDS**

54 Molecular phylogeny; fungal taxonomy; Pleurotineae; corticioid fungi; coralloid fungi; clavarioid fungi; coral  
55 mushroom; Aphyllophorales; fungal diversity; neotropical fungi; attine ants; fungus-farming ants; Attini; Attina

56

57

58

## 59 INTRODUCTION

60 The history of Pterulaceae Corner begins with the hesitant proposal of the genus *Pterula* Fr. (hereinafter  
61 abbreviated as *Pt.*) in the 1820s and 1830s by Elias Magnus Fries (Fries 1821, 1825, 1830). The typification of  
62 this genus was the subject of discussion by Lloyd (1919) and finally enlightened by Corner (1952c) in a  
63 thorough discussion on the timeline of Fries' decisions.

64

65 The number of species in *Pterula* grew during the late 19th and early 20th centuries, with J.H. L veille, N.T  
66 Patouillard, P. C. Hennings, P. A. Saccardo, C. G. Lloyd, C. L. Spegazzini and M. J. Berkeley being the most  
67 active in the naming of taxonomic novelties of *Pterula* in this period (Corner 1950, 1970). Lloyd (1919) devoted  
68 an entire chapter to discuss the taxonomy of the genus.

69

70 However, the major contribution to the genus was made by E. J. H. Corner who added at least 45 new taxa  
71 (Corner 1950, 1952b, 1970, 1966, 1967). Corner (1950) created the Pteruloid series in Clavariaceae Chevall. to  
72 group, besides *Pterula*, other genera with coralloid basidiome and dimitic hyphal system. The Pteruloid series  
73 was raised by Donk (1964) to Pteruloideae, a subfamily of Clavariaceae.

74

75 Pterulaceae was formally proposed by Corner (1970) including the genera from the original Pteruloideae:  
76 *Allantula* Corner, *Deflexula* Corner, *Dimorphocystis* Corner (= *Actiniceps* Berk. & Broome), *Parapterulicium*  
77 Corner, *Pterula* and *Pterulicium* Corner (hereinafter abbreviated as *Pm.*) (Corner 1950, 1952a, b, 1970) (Fig. 1).

78

79 **Fig. 1 Diversity of coralloid genera of Pterulaceae.** A-F: *Myrmecopterula* (A: *Apterostigma* sp. nest with *M.*  
80 *velohortorum* with *Myrmecopterula* sp. SAPVI growing atop of the garden veil; B, C, F: *Myrmecopterula* sp.  
81 D: *Apterostigma* sp. nest with *M. nudihortorum*; E: *M. moniliformis*). G-H: *Pterula* (G: *P. cf. lorentensis*; H: *P.*  
82 *cf. verticillata*). I-L: *Pterulicium* (I: *P. secundirameum*; J: *P. afffluminensis*; K: *P. lilaceobrunneum*. L: *P.*  
83 *sprucei*). M-O: *Phaeopterula* (M: *Phaeopterula* sp.; N: *P. stipata*; O: *P. juruensis*). Close observation on photos  
84 B and C reveal the basidiomes growing from granular substrate resembling substrate of ants' fungus garden.  
85 Photos D and G kindly provided by Ted Schultz and Michael Wherley respectively. Scale bars: 1 cm.

86

87 Following Corner's reclassifications, the major changes in Pterulaceae have resulted from molecular  
88 phylogenetic analyses. *Actiniceps* Berk. & Broome was shown within Agaricales to be distantly related to

89 Pterulaceae and *Parapterulicium* was removed to Russulales (Dentinger and McLaughlin 2006; Leal-Dutra et al.  
90 2018). Four resupinate genera were transferred to Pterulaceae: *Aphanobasidium* Jülich, *Coronicium* J. Erikss. &  
91 Ryvarden, *Merulicium* J. Erikss. & Ryvarden, and *Radulomyces* M.P. Christ. (Larsson 2007; Larsson et al.  
92 2004) and, finally, the new poroid genus *Radulotubus* Y.C. Dai, S.H. He & C.L. Zhao was proposed in the  
93 family (Zhao et al. 2016) (Fig. 2).

94

95 **Fig. 2 Corticioid genera of Pterulaceae (A-C) and Radulomycetaceae (D-F).** A: *Coronicium alboglaucum*.  
96 B-C: *Merulicium fuisporum*. D: *Radulomyces confluens*. E: *Radulotubus resupinatus*. F: *Aphanobasidium cf.*  
97 *pseudotsugae*. Photos kindly provided by L. Zibarová (A and F), S. Blaser (B and C), D.J. Harries (D) and C.L.  
98 Zhao (E). Scale bars: 1 cm.

99

100 Pterulaceae has attracted more attention recently following the discovery of two distinct symbionts of fungus-  
101 farming ants in the genus *Apterostigma* Mayr. Despite the absence (hitherto) of any teleomorph, phylogenetic  
102 analyses placed both species [*Pterula nudihortorum* Dentinger and *Pterula velohortorum* Dentinger, previously  
103 known as G2 and G4 (Dentinger 2014)] in a strongly supported clade within Pterulaceae (Munkacsi et al. 2004;  
104 Villesen et al. 2004).

105

106 Whilst these earlier phylogenetic studies did not focus on resolving evolutionary relationships of the genera,  
107 they did demonstrate that the coralloid genera of Pterulaceae are clearly polyphyletic. Amongst the  
108 morphological characters previously used to separate the genera, but now known to be phylogenetically  
109 unreliable, is the orientation of basidiome growth that differentiates *Pterula* from *Deflexula* and the presence of  
110 a corticioid patch at the base of the basidiome in *Pterulicium*. Therefore, the reclassification of Pterulaceae is  
111 required to restore the monophyly of the genera.

112

113 Our recent fieldwork in Brazil and sampling of fungarium material has yielded sequence data from many  
114 specimens not previously included in phylogenetic analysis, permitting a comprehensive reappraisal of the  
115 phylogeny of Pterulaceae. Here we present a proposal for a new classification based on the phylogeny inferred  
116 from three nuclear loci (nrITS, nrLSU and RPB2), including representatives of all genera currently accepted in  
117 Pterulaceae except *Allantula*. Despite several attempts for recollecting *Allantula* in its type locality, the  
118 monotypic genus is still only known from the type specimen collected by Corner (1952a).

119

## 120 **METHODS**

### 121 *Collections and morphological observations*

122 Several field campaigns between 2011-2017 have obtained new specimens from >15 locations in nine states  
123 across Brazil (Amazonas, Espírito Santo, Minas Gerais, Pará, Paraíba, Paraná, Rio de Janeiro, Rio Grande do  
124 Sul and Santa Catarina).

125

126 The samples were dried in a low-heat food dehydrator and deposited at FLOR, HSTM, INPA, K and RB.  
127 Herbarium acronyms follow Index Herbariorum (Thiers continuously updated). Morphological identification  
128 and taxonomy of Pterulaceae are treated *sensu* Corner. Microscopic observations followed the methods  
129 described in Leal-Dutra (2015) and Leal-Dutra et al. (2018).

130

### 131 *DNA extraction, amplification, cloning and sequencing*

132 DNA was extracted from dried basidiomes or freeze-dried culture first grinding with liquid nitrogen followed by  
133 lysis with CTAB buffer (100 mM Tris-HCl pH 8.0, 1.4 M NaCl, 20 mM EDTA, 2% CTAB), clean-up with  
134 chloroform:isoamyl alcohol (24:1), wash with isopropanol (0.6 vol.) and a final wash with 70% ethanol.

135

136 Partial sequences of the nrITS, nrLSU and RPB2 were amplified by PCR using the primer pairs listed on **Table**  
137 **1** and following the cycling conditions in the original publications. PCR products were purified using 2 U of  
138 Exonuclease I (Thermo Fisher Scientific) and 1 U FastAP Thermosensitive Alkaline Phosphatase (Thermo  
139 Fisher Scientific) per 1 µl of PCR product, incubated at 37 °C for 15 min, followed by heat inactivation at 85  
140 °C for 15 min. The samples were then sent for Sanger sequencing at the FIOCRUZ-MG sequencing platform  
141 (Belo Horizonte, Brazil; through the FungiBrBOL project), the IBERS Translational Genomics Facility  
142 (Aberystwyth University) or Jodrell Laboratory (Royal Botanic Gardens, Kew). The same PCR primers were  
143 used for sequencing; additional primers were used to sequence the nrLSU and RPB2 (**Table 1**).

144

145

146

147

148

149

**Table 1** Primers used in this study for PCR and sequencing.

| Primer     | Region | Application        | Sequence                  | Reference                  |
|------------|--------|--------------------|---------------------------|----------------------------|
| ITS8F      | nrITS  | PCR and sequencing | AGTCGTAACAAGGTTTCCGTAGGTG | (Dentinger et al. 2010)    |
| ITS6R      | nrITS  | PCR and sequencing | TTCCCGCTTCACTCGCAGT       | (Dentinger et al. 2010)    |
| LR0R       | nrLSU  | PCR and sequencing | ACCCGCTGAACTTAAGC         | (Vilgalys and Hester 1990) |
| LR7        | nrLSU  | PCR and sequencing | TACTACCACCAAGATCT         | (Vilgalys and Hester 1990) |
| LR5        | nrLSU  | Sequencing         | TCCTGAGGGAAACTTCG         | (Vilgalys and Hester 1990) |
| fRPB2-5F   | RPB2   | PCR and sequencing | GAYGAYMGWGATCAYTTYGG      | (Liu et al. 1999)          |
| bRPB2-7.1R | RPB2   | PCR and sequencing | CCCATRGCYTYTTMCCCATDGC    | (Matheny 2005)             |
| bRPB2-6F   | RPB2   | Sequencing         | TGGGGYATGGTNTGYCCYGC      | (Matheny 2005)             |

150

151 Chromatograms were checked and sequences assembled and edited using GENEIOUS 10.0.2 (Kearse et al.  
152 2012). Samples presenting indels were cloned using pGEM-T Easy Vector Systems (Promega) into Subcloning  
153 Efficiency DH5 $\alpha$  Competent Cells (Invitrogen). Up to five clones from each sample were amplified and  
154 sequenced as above. The clones sequences were treated as in Leal-Dutra et al. (2018).

155

156 Moreover, 27 sequences of nrITS (4), nrLSU (10) and RPB2 (13) were mined from 13 previously assembled  
157 and unpublished genomes using NCBI BLAST+ package v2.7.1 (Camacho et al. 2009). Two sequences of each  
158 Pterulaceae genus were used as query and the best hit based on the combination of e-value and bit score was  
159 selected; the same hit should usually appear for all query sequences. In one case (sample KM190547), more  
160 than one optimal hit was found; the subject sequences were compared for occurrence of indels and treated as  
161 virtual clones (VC). These sequences are included in the dataset (Table 2).

162

163 The sequences generated in this study have been submitted to GenBank (Table 2).

164

165 **Table 2:** Details of new sequences generated in this study used in the tree of Fig. 3. (a full version is presented  
166 as excel file in Additional file 1).

167

168 Phylogenetic analyses

169 A preliminary maximum-likelihood (ML) analysis was conducted with the sequences generated in this study  
170 alongside GenBank sequences to find the best outgroup for Pterulaceae based on previous studies (Dentinger et  
171 al. 2016; Zhao et al. 2016; Matheny et al. 2006; Larsson 2007) and to assess the similarities between the cloned  
172 sequences ([Additional file 1](#); [Additional file 2](#)).

173

174 **Additional file 1:** Full details of all samples studied here (simplified in Table2; as excel file)

175 **Additional file 2:** Additional phylogenetic reconstructions, including detailed analyses relating to Figure 3

176

177 A reduced version of the previous dataset with only one sequence from each cloned sample was created. After  
178 removing nearly identical sequences with no phylogenetic resolution. The final dataset was comprised of 119  
179 sequences, including 32 sequences from GenBank and using four sequences of *Stephanospora* Pat. as outgroups,  
180 and was divided into five partitions for further analyses: ITS1, 5.8S, ITS2, LSU and RPB2.

181

182 Each partition was aligned separately with MAFFT v7.311 (Katoh and Standley 2013) using the E-INS-i  
183 algorithm for ITS1 and ITS2, and L-INS-i for 5.8S, LSU and RPB2. The alignments were examined and  
184 corrected manually in AliView v1.5 (Larsson 2014) and trimmed to remove uneven ends.

185

186 Maximum-likelihood tree reconstruction was performed with IQ-TREE v1.6.7.1 (Nguyen et al. 2015). The best-  
187 fit evolutionary models and partitioning scheme for this analysis were estimated by the built-in ModelFinder  
188 (option -m MF+MERGE) allowing the partitions to share the same set of branch lengths but with their own  
189 evolution rate (-spp option) (Chernomor et al. 2016; Kalyaanamoorthy et al. 2017). Branch support was assessed  
190 with 1000 replicates of ultrafast bootstrapping (UFBoot) (Hoang et al. 2018) and allowing resampling partitions  
191 and then sites within these partitions to reduce the likelihood of false positives on branch support (option -bspec  
192 GENESITE).

193

194 Bayesian Inference (BI) was implemented using MRBAYES v3.2 (Ronquist et al. 2012) with two independent  
195 runs, each one with four chains and starting from random trees. The best-fit evolutionary models and  
196 partitioning scheme for these analyses were estimated as for the ML analysis but restricting the search to models  
197 implemented on MRBAYES (options -m TESTMERGEONLY -mset mrbayes). Chains were run for  $10^7$   
198 generations with tree sampling every 1000 generations. The burn-in was set to 25% and the remaining trees

199 were used to calculate a 50% majority consensus tree and Bayesian Posterior Probability (BPP). The  
200 convergence of the runs was assessed on TRACER v1.7 (Rambaut et al. 2018) to ensure the potential scale  
201 reduction factors (PSRF) neared 1.0 and the effective sample size values (ESS) were sufficiently large (>200).

202

203 Nodes with BPP  $\geq 0.95$  and/or UFBoot  $\geq 95$  were considered strongly supported.

204

205 Alignment and phylogenetic trees are deposited in Treebase (ID: 24428).

206

## 207 **RESULTS**

208 From this section, all taxa are treated by the nomenclatural treatment proposed in this study.

209

### 210 Field data

211 Fieldwork resulted in the discovery of approximately 100 new specimens, now placed within Pterulaceae (Table  
212 2). Axenic culture isolation was also possible from several of these specimens.

213

### 214 Phylogenetic analyses

215 A total of 278 sequences from 123 samples were generated in this study: 153 nrITS, 74 nrLSU and 51 RPB2; 61  
216 from cloning and 40 from genome mining. The final alignment consisted of 113 sequences with 2737 characters  
217 and 1050 parsimony-informative sites. The BI analysis converged both runs as indicated by the effective sample  
218 sizes (ESS) of all parameters above 2800 and the potential scale reduction factors (PSRF) equal 1.000 for all the  
219 parameters according to the 95% HPD Interval.

220

221 The new classification proposed in this study (Fig. 3), highlights six main clades containing nine genera are  
222 highlighted: Radulomycetaceae (containing *Aphanobasidium*, *Radulotubus* and *Radulomyces*), *Phaeopterula*  
223 (hereinafter abbreviated as *Ph.*; previously *Pterula* spp.), *Coronicium* superclade (grouping *Merulicium* and  
224 *Coronicium*), *Pterulicium* (previously *Pterulicium*, *Pterula* spp. and *Deflexula* spp.), *Pterula* and  
225 *Myrmecopterula* (*Myrmecopterula* gen. nov., previously *Pterula* spp.).

226

227 **Fig. 3 Maximum-likelihood tree of Pterulaceae and Radulomycetaceae.** Support values on the branches are

228 UFBoot/BPP and showed only for UFBoot $\geq 70$  and BPP $\geq 0.70$  and branch length  $\geq 0.003$  substitutions per site.



229 Details for the complete tree can be found in Additional file 2 and TreeBase (ID: 24428). Scale bar: nucleotide  
230 substitutions per site.

231

232 *Radulomycetaceae* (UFBoot=99; BPP=1)

233 This clade groups with strong support three of the five resupinate genera recognized in Pterulaceae, namely

234 *Aphanobasidium* (UFBoot=100; BPP=1), *Radulotubus* (UFBoot=100; BPP=1) and *Radulomyces*

235 (UFBoot=100; BPP=0.86). The placement of *Aphanobasidium* and *Radulomyces* into Pterulaceae was

236 previously shown by phylogenetic reconstructions of corticioid taxa (Larsson et al. 2004; Larsson 2007).

237 *Radulotubus* was proposed by Zhao et al. (2016) as sister clade of *Radulomyces* to accommodate one species

238 bearing poroid hymenophore. In our analyses, *Radulotubus* was recovered in the same position as in the original

239 publication. This is the only poroid species within Pterulaceae.

240

241 No members of the three genera within this superclade are pteruloid (i.e. coralloid basidiomes with dimitic

242 hyphal system) in their morphology and consequently we propose the creation of Radulomycetaceae fam. nov.

243 to accommodate them, as discussed in greater detail below. The current sister clade to Pterulaceae in our

244 analyses is Stephanosporaceae Oberw. & E.Horak, from which members of the Radulomycetaceae clade are

245 clearly distinct phylogenetically and morphologically.

246

247 *Phaeopterula* (UFBoot=100; BPP=1)

248 *Phaeopterula* received maximum support in both analyses. It includes *Pterula stipata* Corner, *Pterula anomala*

249 P. Roberts, *Pterula juruensis* (Henn.) Corner and other species which all have dark brown basidiomes. This

250 clade is the first coralloid lineage to diverge within Pterulaceae. As these species render *Pterula* paraphyletic, a

251 reclassification is needed. The generic name *Phaeopterula* (Henn.) Sacc. & D. Sacc was originally proposed as

252 a subgenus of *Pterula* to accommodate *Ph. hirsuta* Henn. and *Ph. juruensis* (Hennings 1904; Hennings 1899).

253 We propose its reintroduction to distinguish these brown-pigmented taxa from *Pterula* s.s.

254

255 *Coronicium* superclade (UFBoot=98; BPP=1)

256 This clade groups the remaining two resupinate genera of Pterulaceae, the monospecific *Merulicium* and

257 *Coronicium* (UFBoot=100; BPP=1). Both genera form resupinate basidiomes but differ in the hyphal system

258 present (dimitic in *Merulicium*, monomitic in *Coronicium*). Some *Pterulicium* species also show transitions in

259 their morphology to a resupinate state. Corner (1950) showed that *Pm. xylogenum* (Berk. & Broome) Corner  
260 could form monomitic corticioid patches independent of the coralloid state and even in its absence, thus  
261 appearing to be truly corticioid. Furthermore, experimental studies on *Pm. echo* D.J. McLaughlin & E.G.  
262 McLaughlin show a dimitic, resupinate, fertile corticioid phase both on agar and when cultured on cocoa twigs  
263 (McLaughlin and McLaughlin 1980; McLaughlin et al. 1978; McLaughlin and McLaughlin 1972). Despite the  
264 morphological distinctiveness from the rest of Pterulaceae, there is a trend in the morphology and strong  
265 phylogeny support for the placement of the *Coronicium* superclade among *Pterula/Myrmecopterula* and  
266 *Pterulicium* clades within Pterulaceae.

267

268 *Pterulicium* (UFBoot=99; BPP=1)

269 Two type species, *Pterulicium xylogenum* and *Deflexula fascicularis*, are nested within this clade alongside  
270 several species currently assigned to *Pterula* but which all have simple basidiomes (unbranched or limited  
271 branching). The *Pterula* species are interspersed with some *Deflexula*, rendering both genera polyphyletic.  
272 *Pterulicium xylogenum* forms a well-supported subclade with *Pterula secundiramea* (Lév.) Corner (= *Pm.*  
273 *palmicola* Corner). *Deflexula fascicularis* forms a subclade with other *Deflexula* species that share globose  
274 spores, an unusual feature within Pterulaceae, most of which form ellipsoid to subamygdaliform spores.

275

276 *Pterula* (UFBoot=100; BPP=1)

277 This clade groups the true *Pterula* spp. that are represented by very bushy coralloid basidiomes, usually robust  
278 and taller than those of *Pterulicium*, stipe concolorous with hymenophore and lacking a cottony subiculum.

279

280 *Pterula* has a mainly pantropical and pan-subtropical distribution, with occurrence reported to all continents  
281 except Antarctica (Corner 1970).

282

283 *Myrmecopterula* (UFBoot=97; BPP=1)

284 This sister clade of *Pterula* represents the newly proposed genus (see below). It groups the two species  
285 cultivated by attine ants in the *Apterostigma pilosum* group with *M. moniliformis* and several unidentified free-  
286 living species. The species in this clade are only known from the Neotropics. *Myrmecopterula* is divided in  
287 seven subclades (Fig. 3) representing the two mutualists (MUT 1-2), three closely related to *M. velohortorum*  
288 (SAPV 1-3), one closely related to *M. nudihortorum* (SAPN1) and one of unknown relationship (SAPX1).

289

290 *Taxonomy*

291 **Radulomycetaceae** Leal-Dutra, Dentinger, G.W. Griff., **fam. nov.**

292 MycoBank MB831047 (**Fig. 2D-F**)

293

294 Etymology

295 From the type genus *Radulomyces*.

296

297 Diagnosis

298 Basidiome resupinate, effused, mostly adnate, ceraceous, hymenophore smooth, tuberculate, odontoid, raduloid

299 or poroid. Hyphal system monomitic, generative hyphae with clamps, hyaline, thin- to slightly thick-walled.

300 Cystidia absent. Basidia terminal clavate or other form if pleural, usually with 4-sterigmata and a basal clamp.

301 Basidiospores ellipsoid to globose, hyaline, mostly smooth, thin- to slightly thick-walled, acyanophilous,

302 inamyloid and non-dextrinoid.

303

304 Type genus

305 *Radulomyces* M.P. Christ.

306

307 Notes

308 *Radulomyces*, *Aphanobasidium* and *Radulotubus* are placed in Radulomycetaceae fam. nov. Larsson (2007)

309 suggested that *Lepidomyces* Jülich has affinities to *Aphanobasidium* and could possibly be placed in

310 Pterulaceae. However, no sequence data for the genus are available. *Lepidomyces* is described as bearing

311 pleurobasidia as in *Aphanobasidium*, but also leptocystidia as in *Coronicium* and *Merulicium*. Given its

312 morphological similarities to the *Aphanobasidium* and the *Coronicium* superclade, we suggest to keep

313 *Lepidomyces* as *incertae sedis* until molecular data are available to confirm its phylogenetic position.

314

315 *Phaeopterula* (Henn.) Sacc. & D. Sacc., *Syll. fung.* **17**: 201 (1905)

316 (**Fig. 1M-O**)

317

318 Basionym

319 *Pterula* subgen. *Phaeopterula* Henn., in Warburg, *Monsunia* 1: 9 (1899) [1900].

320

321 Type Species

322 *Phaeopterula hirsuta* (Henn.) Sacc. & D. Sacc.

323

324 Updated description:

325 Basidiomes Pteruloid solitary or gregarious, scarcely branched to almost bushy, monopodial and slightly

326 symmetric, branches from light brownish pink or greyish to pale brown and stipe dark reddish to rusty brown.

327 Stipe surface glabrous with agglutinated hyphae (not sclerotoid) to villose-tomentose. Dark brown mycelial

328 cords usually present. Hyphal system dimitic with thick-walled skeletal hyphae, generative hyphae thin-walled

329 and often clamped. Hymenial cystidia absent, caulocystidia sometimes present. Basidia terminal, clavate to

330 suburniform. Basidiospores less than 9  $\mu\text{m}$  varying between pip-shaped, subamygdaliform and ellipsoid.

331 Growing on dead twigs or dead wood.

332

333 Notes

334 Hennings (1899) created the subgenus *Phaeopterula* to accommodate *Pterula hirsuta* that was distinguished

335 from other *Pterula* spp. by its reportedly brown spores. Hennings (1904) later described a second species in the

336 subgenus, *Ph. juruensis*, but noted that it was morphologically quite distinct from *Ph. hirsuta*. *Phaeopterula* was

337 raised to genus level by Saccardo and Saccardo (1905) who cited only *Ph. juruensis*. *Pterula hirsuta* was

338 recombined in *Dendrocladium* by Lloyd (1919) but later put back in *Pterula* by Corner (1950), even though

339 Corner did not confirm the presence of brown spores in the samples he examined. Although we also have not

340 observed pigmented spores in any of these taxa, dark brown pigments in the stipe hyphae are a consistent and

341 diagnostic feature in this group, so we resurrect the name *Phaeopterula* and reassign the reference to brown in

342 the name (phaeo-) to the brown hyphal pigments rather than brown-pigmented basidiospores.

343

344 *Pterulicium* Corner, *Monograph of Clavaria and allied Genera*: 689, 699 (1950)

345 **(Fig. 1I-L)**

346

347 Type Species

348 *Pterulicium xylogenum* (Berk. & Broome) Corner

349

350 Updated description

351 Basidiomes pteruloid rarely corticioid, solitary or gregarious, simple or scarcely branched, occasionally  
352 exhibiting abundant unilateral branching (Fig. 1I and 1L), with colour varying from creamy white to brown on  
353 the stipe and creamy white on the tips or creamy white or pale lilaceous to pale brown on uniformly coloured  
354 basidiomes. Stipe surface sometimes sclerotoid [see Corner, (1950)]. Hyphal system dimitic with slightly thick-  
355 walled skeletal hyphae, generative hyphae thin-walled and often clamped. Hymenial cystidia usually present,  
356 caulocystidia sometimes present. Basidia terminal, clavate to suburniform. Basidiospores shape varying between  
357 globose to subglobose, pip-shaped, amygdaliform to subamygdaliform, ellipsoid. Growing on dead leaves, dead  
358 twigs or dead wood, rarely as a pathogen or endophyte of living plants.

359

360 Notes

361 *Deflexula* is synonymised with *Pterulicium* in this study. In addition, several species previously placed in  
362 *Pterula* are transferred to *Pterulicium* (see the new combinations below). Other *Pterula* species that might need  
363 to be recombined in *Pterulicium*, require further investigation since their original descriptions do not provide  
364 enough information to confidently assign them here.

365

366 *Myrmecopterula* Leal-Dutra, Dentinger & G.W. Griff., **gen. nov.**

367 MycoBank MB831048 (**Fig. 1A-F**)

368

369 Etymology

370 From the ancient Greek word μύρμηκος (=mýrmēkos), genitive form of μύρμηξ (=mýrmēx), ants. Thus, *Pterula*  
371 of the ants, due to the observed relationship of most taxa in this genus with nests of fungus-growing ants.

372

373 Type Species

374 *Myrmecopterula moniliformis* (Henn.) Leal-Dutra, Dentinger & G.W. Griff.

375

376 Diagnosis

377 Usually associated with the nests of ants, growing on top or from living or dead nest or being cultivated by the  
378 ants. Bushy pteruloid basidiome, white-cream to light-brown and greyish surface, normally concolorous or stipe

379 with a darker tone than the hymenophore, arising from cottony subiculum with mycelial cords, stipe surface  
380 sterile, dimitic hyphal system, relatively small spores (usually less than 7µm wide), or no basidiome. Differs  
381 from *Pterula* by the presence of the cottony subiculum.

382

383 Notes

384 Basidiomes of *Myrmecopterula* species are very similar to *Pterula* in habit, shape and colour, but they differ in  
385 the presence of mycelial cords and of a cottony subiculum from which basidiomes emerge. Some species of  
386 *Myrmecopterula* arise from soil, while others superficially appear to grow on wood. Closer observation of  
387 wood-dwelling basidiomes revealed that rather than being lignicolous, instead they grow from a loose, granular  
388 substrate within a cavity inside the wood. This substrate in some cases resembles the substrate in the fungus  
389 gardens of *Apterostigma pilosum* group ants. In addition, *M. moniliformis*, which arises from soil, has been  
390 found emerging from active and inactive attine nests, (S. Sourell, pers. comm.; M.C. Aime, pers. comm.). Thus,  
391 all but one of the *Myrmecopterula* taxa found to date are associated with attine ants, of which the two farmed  
392 mutualist species (*M. nudihortorum* and *M. velohortorum*) are best known (REF). The five other species (of  
393 which only *M. moniliformis* is named) are less well studied and may play a role in decomposition of residual  
394 substrates in abandoned fungus garden, or potentially even as mycoparasites of the ant cultivar. In contrast, no  
395 *Pterula* spp. have any reported association with ants, but instead are found growing directly from wood and leaf  
396 litter.

397

398 *Myrmecopterula moniliformis* (Henn.) Leal-Dutra, Dentinger & G.W. Griff., **comb. nov.**

399 MycoBank MB831049 (**Fig. 1E**)

400

401 Basionym: *Lachnocladium moniliforme* Henn., *Hedwigia* **43**(3): 198 (1904).

402

403 Synonym: *Pterula moniliformis* (Henn.) Corner, *Ann. Bot., Lond.*, n.s. **16**: 569 (1952). *Thelephora clavarioides*

404 Torrend, *Brotéria*, sér. bot. **12**(1): 61 (1914).

405

406 Description in (Corner 1952b).

407

408 *Myrmecopterula nudihortorum* (Dentinger) Leal-Dutra, Dentinger & G.W. Griff., **comb. nov**

409 MycoBank MB831050 (**Fig. 1D**)

410

411 Basionym: *Pterula nudihortorum* Dentinger [as '*nudihortus*', later referred to as '*nudihorta*'], *Index Fungorum*

412 **98**: 1 (2014).

413

414 Updated Description

415 In the field, it is recognized by the absence of any veil on the fungus garden in the *Apterostigma* nests, usually

416 inside decomposing trunks or underground. In culture, it forms very little aerial mycelium and exhibits very

417 slow growth (2-3 mm/week radial growth rate on PDA at 25C). Hyphal clamps abundant.

418

419 Notes

420 This species was formerly known as the ant cultivar G4. It is only known from the nest of fungus-growing ants

421 in the *Apterostigma pilosum* group in the *A. manni* subclade (Schultz 2007).

422

423 *Myrmecopterula velohortorum* (Dentinger) Leal-Dutra, Dentinger & G.W. Griff., **comb. nov.**

424 MycoBank MB831051 (**Fig. 1A**)

425

426 Basionym: *Pterula velohortorum* Dentinger [as '*velohortus*', later referred to as '*velohorta*'], *Index Fungorum*

427 **98**: 1 (2014).

428

429 Updated description.

430 In the field, it is recognized by the *Apterostigma* garden covered by a mycelial veil, usually inside decomposing

431 trunks, below the leaf litter or hanging on exposed surfaces aboveground. In culture, it forms very cottony aerial

432 mycelia with presence of racquet hyphae (Fig. 5 in **Additional file 3**). Large and abundant hyphal clamps. Slow

433 growth rate, but faster than *M. nudihortorum*.

434

435 **Additional file 3: Additional images of coralloid Pterulaceae and micrographs of *Myrmecopterula***

436 *velohortorum*.

437

438 Notes

439 This species was formerly known as the ant cultivar G2. It is only known from the nest of fungus-growing ants  
440 in the *Apterostigma pilosum* group in the *A. dentigerum* subclade (Schultz 2007).

441

## 442 **Discussion**

### 443 Introduction of Radulomycetaceae

444 We consider that it is better to erect a new family for these three genera than to leave them in Pterulaceae where  
445 they are clearly phylogenetically and morphologically distinct from nearly all the other member of Pterulaceae.

446 In contrast, *Merulicium* (Fig. 2B-C) and *Coronicium* (Fig. 2A) form corticioid basidiomes but our phylogenetic  
447 analyses place them clearly within Pterulaceae. Two *Pterulicium* species, *Pm. echo* and *Pm. xyloenum*, also  
448 form both pteruloid and corticioid basidiomes, either independently or together (McLaughlin and McLaughlin  
449 1980; Corner 1950).

450

451 Whilst the corticioid basidiomes of *Merulicium* and *Pm. echo* contain a dimitic hyphal system, typical of  
452 Pterulaceae, those of *Coronicium* spp. and *Pterulicium xyloenum* form a monomitic hyphal system, like all  
453 members of Radulomycetaceae. However, no members of Radulomycetaceae form cystidia, whereas these cells  
454 are found in most Pterulaceae (McLaughlin and McLaughlin 1980; Corner 1970, 1967, 1952a, b, 1950;  
455 Bernicchia and Gorjón 2010), including *Coronicium* spp.

456

457 Thus, Radulomycetaceae fam. nov. is morphologically characterized by the combination of resupinate  
458 basidiomes, monomitic hyphal system and lack of cystidia. Moreover, our phylogenetic analyses strongly  
459 support the segregation of Radulomycetaceae fam. nov. from Pterulaceae.

460

### 461 Reintroduction of *Phaeopterula*

462 *Phaeopterula* spp. are distinct from other pterulaceous genera due to the distinctive brown colour of the main  
463 axis of the basidiome and monopodial/symmetric branching of these structures. This contrasts with other  
464 Pterulaceae which are either highly branched (bushy) and of uniform colour (*Pterula* and *Myrmecopterula*) or  
465 pigmented only at the stipe base, and (mostly) unbranched (*Pterulicium*). Hennings (1899) originally defined  
466 *Phaeopterula* by its brown spores. Corner (1950) cast doubt on the significance of this trait but our results show  
467 that, despite an apparently misguided justification, Hennings was correct to group *Ph. juruensis* with *Ph.*

468 *hirsuta*.



469

470 All *Phaeopterula* spp. are exclusively found on decaying wood, whereas members of other genera of  
471 Pterulaceae inhabit more diverse lignocellulosic substrates. Given the basal position of *Phaeopterula* in  
472 Pterulaceae, and the fact that all members of the sister family Radulomycetaceae are also lignicolous on wood,  
473 this habit is parsimoniously the ancestral condition. The reintroduction of *Phaeopterula* aims to pay tribute to  
474 Paul Hennings' work and his contribution to the taxonomy of Pterulaceae.

475

#### 476 Synonymy of *Deflexula* with *Pterulicium*

477 Besides the paraphyly represented by *Phaeopterula*, the *Pterulicium* clade shows the clear polyphyly of *Pterula*  
478 and *Deflexula*. Several species in the two latter genera are intermixed in a strongly supported subclade (Fig. 3).  
479 The presence of the type species of both *Deflexula* and *Pterulicium* within this clade requires that only one name  
480 be kept. Both genera were proposed by Corner (1950), to accommodate the dimitic and coralloid (but non-  
481 bushy) species, not fitting the description of *Pterula*. The name *Pterulicium* was based on a 'portmanteau'  
482 combination of *Pterula* and *Corticium* to reflect the presence of a corticioid patch at the stipe base (Corner  
483 1950). However, this patch has only been reported in two species, *Pterulicium xylogenum* (Corner 1950) and  
484 *Pm. echo* (McLaughlin and McLaughlin 1980). *Deflexula* was named for the downward-oriented (positively  
485 geotropic) basidiomes (Corner 1950). Corner (1950) stated that the resupinate patch in *Pterulicium xylogenum* is  
486 monomitic, can exist independently of the coralloid basidiome and is fertile when facing downward; he  
487 suggested that there was a close similarity between *Deflexula* and *Pterulicium* in the way the resupinate patch  
488 develops from the base of the basidiome. He also made a case for the formation of a fertile hymenium when  
489 facing downward in the two genera as supporting this similarity. Nonetheless, experimental studies on *Pm. echo*  
490 show that orientation of the hymenium does not affect the ability to produce spores, i.e., the hymenium is  
491 ageotropic (McLaughlin et al. 1978) and raised doubts about the validity of the genus *Deflexula*. This  
492 morphological distinction is not supported by phylogenetic analysis (Dentinger et al. 2009, Fig. 3) and its  
493 emphasis through taxonomic preservation would perpetuate misunderstanding. Accordingly, we propose to  
494 retain *Pterulicium* for this clade to avoid major misinterpretations of the species morphology.

495

#### 496 Introduction of *Myrmecopterula* gen. nov.

497 Two species of Pterulaceae are cultivated by fungus-farming ants of the *Apterostigma pilosum* group in South  
498 and Central America (Dentinger et al. 2009; Munkacsi et al. 2004; Villesen et al. 2004; Mueller et al. 2018).

499 Despite intensive investigation, neither has been observed to form basidiomes, but *M. velohortorum* is  
500 characterised by the formation of a veil of mycelium around the fungus garden, whilst *M. nudihortorum* lacks  
501 this veil. We recovered both species in a strongly supported clade, as a sister clade of *Pterula*, alongside five  
502 other subclades containing fertile, apparently free-living species.  
503  
504 All the samples in this clade were collected from neotropical habitats (Fig. 1A-F), mostly as part of our recent  
505 fieldwork. During sampling campaigns by ourselves and others, it was observed that many of the ‘free-living’  
506 specimens were associated in some way with living ant colonies or abandoned attine nests. Two  
507 *Myrmecopterula* samples belonging to subclade SAPV1 (CALD170307-02 and CALD170307-03; Fig. 1A)  
508 were found forming basidiomes atop two distinct but adjacent (1 m apart) living *Apterostigma* nests in  
509 Amazonian Rainforest. The cultivated mutualists from both nests were also analysed and found to belong to *M.*  
510 *velohortorum* confirming that the basidiomes were not linked to the cultivated mycelia in these nests. The third  
511 member of subclade SAPV1 was also reported forming a nascent basidiome on a living *Apterostigma* nest in  
512 Panama (Munkacsi et al. 2004). *M. moniliformis* (SAPN1; Fig. 1E) has been reported to be found outside both  
513 active and apparently inactive (see *Myrmecopterula*: Notes on Taxonomy section above) attine nests (S. Sourell,  
514 pers. comm.; M.C. Aime, pers.comm.) as was CALD170315-04 (SAPV2; Fig. 1B) and CALD170122-04  
515 (SAPV3; Fig. 1C). Lastly, the mycelium of one sample (JSP 07-03 B 5.1; SAPV3) was isolated from a living  
516 *Atta capiguara* nest by Pereira et al. (2016).  
517  
518 The observations above and the phylogenetic analyses suggests that association with attine ants is a widespread  
519 trait amongst members of this clade, hence its naming as *Myrmecopterula*.  
520  
521 The ecological roles of Pterulaceae are not well understood, most being classified from superficial observations  
522 as saprotrophs, growing on wood or leaf litter, with wood decay potentially being the ancestral state as discussed  
523 above. Whilst many species are found inhabiting soil or litter, two species are reported to associate with living  
524 plants, namely *Pterula* cf. *tenuissima*, endophytic in asymptomatic leaves of *Magnolia grandiflora*, and  
525 *Pterulicium xyloenum*, causal agent of culm rot disease of bamboo (Munkacsi et al. 2004; Villesen et al. 2004;  
526 Harsh et al. 2005) and possibly also a pathogen of sugarcane [see Corner (1952b)].  
527

528 Most recent attention on Pterulaceae has been lavished on the ant-cultivated mutualists *M. nudihortorum* and *M.*  
529 *velohortorum*. These were once thought to be sister clades (Munkacsi et al. 2004; Villesen et al. 2004) but are  
530 now known to be only distantly related within the *Myrmecopterula* clade (Dentinger et al. 2009, Fig. 3). This  
531 suggests two possibilities for the evolution of the *Myrmecopterula*-*Apterostigma* mutualism: 1) that it evolved  
532 independently on two occasions or, 2) that it is an ancestral condition of all *Myrmecopterula*. However, it is at  
533 present unclear whether the extant mutualistic association found for *M. nudihortorum* and *M. velohortorum* is  
534 ancestral, implying that the other taxa escaped the mutualism, or whether the looser association with ant nests  
535 widespread amongst members of *Myrmecopterula* was more recently elevated to a higher level of  
536 interdependence for these two species, as suggested by Dentinger et al. (2009).

537

538 The basis of the association of ‘free-living’ species with attine ants and/or their abandoned nests is unclear.  
539 Given the apparent preference of some for abandoned nests, they may be specialised early stage colonisers of  
540 ant nest debris. A further possibility is that they are cheaters, deriving nutrition from the ant-collected biomass  
541 but not reciprocating by producing hyphae palatable to ants. This would represent a novel form of fungal  
542 mimicry, perhaps achieved by the ants’ inability to differentiate hyphae of closely related species. Lastly, they  
543 may be mycoparasitic, including on ant cultivars, although there is currently no direct evidence supporting this  
544 hypothesis.

545

#### 546 Re-delimitation of Pterulaceae

547 All the accepted genera in Pterulaceae were sampled in this study except for the monotypic *Allantula*. One  
548 specimen, with morphology consistent with Corner’s description of *Allantula diffusa*, with pteruloid basidiomes  
549 borne on slender mycelial cords as curved intercalary swellings, was collected during our fieldwork (Fig. 1M).  
550 Phylogenetic reconstruction placed this specimen firmly within *Phaeopterula*. However, we have been unable to  
551 obtain the type specimen (no other collections authenticated exist) for more detailed analysis.

552

553 Thus, we re-delimit Pterulaceae containing six genera: *Allantula*, *Coronicium*, *Merulicium*, *Myrmecopterula*,  
554 *Phaeopterula*, *Pterula* and *Pterulicium*.

555

556

557

558 **Conclusion**

559 In this study, we presented a reclassification of Pterulaceae based on morphological and phylogenetic analyses  
560 with samples from six out of seven genera previously accepted in the family. Three early diverging resupinate  
561 genera were placed in Radulomycetaceae fam. nov. (*Aphanobasidium*, *Radulomyces* and *Radulotubus*),  
562 *Myrmecopterula* gen. nov. was erected to accommodate ant associated species previously classified in *Pterula*;  
563 several species from the latter were also recombined in the reintroduced *Phaeopterula* and in *Pterulicium*, and  
564 finally *Deflexula* was synonymised with *Pterulicium*. Pterulaceae was thus re-delimited to accommodate seven  
565 genera *Allantula*, *Coronicium*, *Merulicium*, *Myrmecopterula*, *Phaeopterula*, *Pterula* and *Pterulicium*.

566

567 Some species kept in *Pterula* might also need to be recombined since the original description was not enough to  
568 make these changes. Type specimens should be analysed considering the delimitations proposed in this study.

569

570 **Key to genera of Pterulaceae and Radulomycetaceae fam. nov.**

- 571 1.1 Cultivated by ants on *Apterostigma pilosum* group, basidiomes absent ..... *Myrmecopterula*\*
- 572 1.2 Growing free-living, basidiomes present ..... 2
- 573 2.1 Basidiomes resupinate to effused ..... 3
- 574 2.2 Basidiomes coralloid, thread like or allantoid\*\* ..... 10
- 575 3.1 Hymenophore surface poroid ..... *Radulotubus*
- 576 3.2 Hymenophore surface smooth, tuberculate, odontoid to raduloid or meruloid ..... 4
- 577 4.1 Cystidia present ..... 5
- 578 4.2 Cystidia absent ..... 8
- 579 5.1 Hyphal system monomitic ..... 6
- 580 5.2 Hyphal system dimitic ..... 7
- 581 6.1 Spores ellipsoid to navicular, thin-walled, cystidia with incrustation ..... *Coronicium*
- 582 6.2 Spores amygdaliform, slightly thick-walled, cystidia smooth ..... *Pterulicium xylogenum*\*\*\*

|     |                                                                                                                        |                                  |
|-----|------------------------------------------------------------------------------------------------------------------------|----------------------------------|
| 583 | 7.1 Hymenophore surface meruloid, presence of cystidia with resinous excretion .....                                   | <i>Merulicium</i>                |
| 584 | 7.2 Hymenophore surface smooth, cystidia smooth .....                                                                  | <i>Pterulicium echo</i> ***      |
| 585 | 8.1 Basidia pleural .....                                                                                              | <i>Aphanobasidium</i>            |
| 586 | 8.2 Basidia terminal .....                                                                                             | 9                                |
| 587 | 9.1 Spores ellipsoid to globose .....                                                                                  | <i>Radulomyces</i>               |
| 588 | 9.2 Spores amygdaliform .....                                                                                          | <i>Pterulicium xylogenum</i> *** |
| 589 | 10.1 Basidiome allantoid with swollen fertile regions intercalating with mycelial chords .....                         | <i>Allantula</i>                 |
| 590 | 10.2 Basidiome coralloid or thread like .....                                                                          | 11                               |
| 591 | 11.1 Stipe and base of branches very dark brown fading towards the tips .....                                          | <i>Phaeopterula</i>              |
| 592 | 11.2 Basidiomes uniformly coloured or only the stipe light brown coloured .....                                        | 12                               |
| 593 | 12.1 Basidiomes simple or scarcely branched, growing up- or downwards .....                                            | <i>Pterulicium</i>               |
| 594 | 12.2 Basidiomes densely ramified, always ageotropic .....                                                              | 13                               |
| 595 | 13.1 Cottony subiculum present, associated with attine ants .....                                                      | <i>Myrmecopterula</i>            |
| 596 | 13.2 Cottony subiculum absent, without association with attine ants .....                                              | <i>Pterula</i>                   |
| 597 |                                                                                                                        |                                  |
| 598 | * <i>Myrmecopterula</i> cultivated by <i>Apterostigma</i> was never reported forming basidiomes.                       |                                  |
| 599 | ** Allantoid = sausage-shaped, in this case with inflated portions of hymenium intercalating with rhizomorph           |                                  |
| 600 | [see <i>Allantula</i> in Corner (1952a)]                                                                               |                                  |
| 601 | *** <i>Pterulicium xylogenum</i> and <i>Pm. echo</i> can have corticioid growth independently of coralloid basidiomes. |                                  |
| 602 | The cystidia in the former may be either present or absent.                                                            |                                  |

603 **ACKNOWLEDGEMENTS**

604 The authors are grateful to the managers of Parque Nacional da Tijuca (ICMBio), Floresta Nacional do Tapajós,  
605 Parque Nacional do Iguaçu, Parque Nacional da Serra dos Órgãos and Reserva Biológica Augusto Ruschi, for  
606 logistical support and collection permits. Biological Dynamics of Forest Fragmentation Project (BDFFP) for  
607 providing logistical and field support. This is publication XXX of the BDFFP - INPA/STRI Technical Series  
608 (field reserve; location of specimen used here). We thank Supercomputing Wales for computing support. We are  
609 also thankful for the kind support and loan from the following herbaria: FLOR (Universidade Federal de Santa  
610 Catarina), K (Royal Botanical Gardens, Kew), INPA (Instituto Nacional de Pesquisas da Amazônia), HSTM  
611 (Universidade Federal do Oeste do Pará), CGE (Cambridge University). We thank the FungiBrBOL project for  
612 use of the FIOCRUZ-MG sequencing platform. The researchers who kindly collect and provide samples or  
613 photos, or helped in other way to this study: Ted Schultz, M. Cathie Aime, Dennis Desjardin, D. Jean Lodge,  
614 Bitty Roy, Michael Wherley, Tobias Policha, Jesse McAlpine, Tommy Jenkinson, Rocío Manobanda, Celeste  
615 Heisecke, Altielys C. Magnago, Eduardo P. Fazolino, Ariadne N. M. Furtado, Emerson L. Gumboski, Elisandro  
616 R. Drechsler-Santos, Julia Simon, Cauê Oliveira, Stefan Blaser, David J. Harries, Genivaldo Alves da Silva,  
617 Susanne Sourell, Lucie Zíbarová and André Rodrigues, Quimi Vidaurre Montoya, Louro Lima, Ocírio Juruna de  
618 Souza Pereira, Laura Martínez-Suz, Shaun Pennycook, Phillip Camarota Moura and Rafael Trevisan.

619

620 **DECLARATION**

621 **Ethics approval and consent to participate**

622 Not applicable

623

624 **Adherence to national and international regulations**

625 For samples obtained from fungarium collections, appropriate permissions were granted. Field sampling was  
626 undertaken with appropriate permissions from Brazilian authorities.

627

628 **Consent for publication**

629 All authors have approved the manuscript for submission

630

631 **Availability of data and material**

632 All the sequences generated in this study are deposited in GenBank (accession numbers can be found in  
633 Additional file 1). Alignments used to generate the phylogenies are deposited on TreeBase (ID: 24428). Samples  
634 are deposited in the fungaria indicated on Additional file 1, some might be available from the authors via request.

635

#### 636 **Competing interests**

637 The authors declare no competing interests

638

#### 639 **Funding**

640 This article is part of the PhD thesis of CALD. CALD scholarship was provided by Coordination for the  
641 Improvement of Higher Education Personnel - Brazil, BEX 2145/15-4. Funding was provided in part from a  
642 Systematics and Taxonomy (SynTax) grant (Biotechnology and Biological Sciences Research Council, Natural  
643 Environment Research Council) to BTMD. Funding was provided in part by the National Geographic Society  
644 (No. 8317-07 to B.A. Roy and B.T.M. Dentinger) and the National Science Foundation (DEB-0841613 to B.A.  
645 Roy and B.T.M. Dentinger). The Institute of Biological, Environmental and Rural Sciences receives strategic  
646 funding from the Biotechnology and Biological Sciences Research Council (BBSRC; BBS/OS/GC/000011B).

647

#### 648 **Authors' contributions**

649 CALD, BTMD, MAN, DJM, EGM and LAC conducted field sampling; CALD and LAC conducted the  
650 sequencing and phylogenetic analyses; CALD, GWG and BTMD wrote the manuscript with input from DJM,  
651 EGM, LAC and MAN

652

#### 653 **REFERENCES**

- 654 Bernicchia A, Gorjón SP (2010) Corticiaceae s.l. Fungi Europaei, vol 12. Candusso, Italia
- 655 Camacho C, Coulouris G, Avagyan V, Ma N, Papadopoulos J, Bealer K, Madden TL (2009) BLAST+:  
656 architecture and applications. *BMC Bioinformatics* 10 (1):421. doi:10.1186/1471-2105-10-421
- 657 Chernomor O, von Haeseler A, Minh BQ (2016) Terrace Aware Data Structure for Phylogenomic Inference  
658 from Supermatrices. *Systematic Biology* 65 (6):997-1008. doi:10.1093/sysbio/syw037
- 659 Corner EJH (1950) A monograph of Clavaria and allied genera, vol 1. *Annals of Botany memoirs*. Dawsons,  
660 London

- 661 Corner EJH (1952a) Addenda Clavariacea I. Two new Pteruloid genera and Deflexula. *Annals of Botany* 16  
662 (2):269-291
- 663 Corner EJH (1952b) Addenda Clavariacea II. Pterula and Pterulicium. *Annals of Botany* 16 (4):531-569
- 664 Corner EJH (1952c) Generic names in Clavariaceae. *Transactions of the British Mycological Society* 35  
665 (4):285-298
- 666 Corner EJH (1957) Some clavarias from Argentina. *Darwiniana* 11 (2):193-206
- 667 Corner EJH (1966) Clavarioid genera and Thelephora from the Congo. *Bulletin du Jardin botanique de l'État a*  
668 *Bruxelles* 36 (Fasc. 3):257-279
- 669 Corner EJH Clavarioid fungi of the Solomon Islands. In: *Proceedings of the Linnean Society of London, 1967.*  
670 *vol 2. Oxford University Press, pp 91-106*
- 671 Corner EJH (1970) Supplement to "A Monograph of Clavaria and Allied Genera". *Beihefte zur Nova Hedwigia*  
672 33:1-299
- 673 Dentinger BTM (2014) Nomenclatural novelties. *Index Fungorum* (98):1
- 674 Dentinger BTM, Gaya E, O'Brien H, Suz LM, Lachlan R, Díaz-Valderrama JR, Koch RA, Aime MC (2016)  
675 Tales from the crypt: genome mining from fungarium specimens improves resolution of the mushroom tree  
676 of life. *Biological Journal of the Linnean Society* 117 (1):11-32. doi:10.1111/bij.12553
- 677 Dentinger BTM, Lodge DJ, Munkacsı AB, Desjardin DE, McLaughlin DJ (2009) Phylogenetic Placement of an  
678 Unusual Coral Mushroom Challenges the Classic Hypothesis of Strict Coevolution in the Apterostigma  
679 Pilosum Group Ant-Fungus Mutualism. *Evolution* 63 (8):2172-2178. doi:10.1111/j.1558-  
680 5646.2009.00697.x
- 681 Dentinger BTM, Margaritescu S, Moncalvo J-M (2010) Rapid and reliable high-throughput methods of DNA  
682 extraction for use in barcoding and molecular systematics of mushrooms. *Molecular Ecology Resources* 10  
683 (4):628-633. doi:10.1111/j.1755-0998.2009.02825.x
- 684 Dentinger BTM, McLaughlin DJ (2006) Reconstructing the Clavariaceae using nuclear large subunit rDNA  
685 sequences and a new genus segregated from Clavaria. *Mycologia* 98 (5):746-762. doi:DOI  
686 10.3852/mycologia.98.5.746
- 687 Dogma IJ (1966) Philippine Clavariaceae. I. The pteruloid series. *Philippine Agriculturist* 49 (10):18
- 688 Donk MA (1964) A conspectus of the families of Aphyllophorales. *Persoonia* 3 (2):199-324
- 689 Fries EM (1821) *Systema Mycologicum volumen I, vol 1. Ex Officina Berlingiana. Lund & Greifswald*
- 690 Fries EM (1825) *Systema Orbis Vegetabilis Typographia Academia. Lundae, Sweden*



- 691 Fries EM (1830) *Eclogae fungorum, praecipue ex herbariis germanorum de scriptorum*. Linnaea
- 692 Harsh SNK, Singh YP, Gupta HK, Mushra BM, McLaughlin DJ, Dentinger B (2005) A new culm rot disease of
- 693 bamboo in India and its management. *J Bamboo Rattan* 4:387-398
- 694 Hennings P (1899) *Fungi monsunenses*. *Monsunia* 1:38
- 695 Hennings P (1904) *Fungi amazonici II, a cl. Ernesto Ule collecti*. *Hedwigia* 43:242-273
- 696 Hoang DT, Chernomor O, von Haeseler A, Minh BQ, Vinh LS (2018) UFBboot2: Improving the Ultrafast
- 697 Bootstrap Approximation. *Molecular biology and evolution* 35 (2):518-522. doi:10.1093/molbev/msx281
- 698 Kalyaanamoorthy S, Minh BQ, Wong TKF, von Haeseler A, Jermin LS (2017) ModelFinder: fast model
- 699 selection for accurate phylogenetic estimates. *Nature Methods* 14:587. doi:10.1038/nmeth.4285
- 700 Katoh K, Standley DM (2013) MAFFT multiple sequence alignment software version 7: improvements in
- 701 performance and usability. *Molecular biology and evolution* 30 (4):772-780. doi:10.1093/molbev/mst010
- 702 Kearse M, Moir R, Wilson A, Stones-Havas S, Cheung M, Sturrock S, Buxton S, Cooper A, Markowitz S,
- 703 Duran C, Thierer T, Ashton B, Meintjes P, Drummond A (2012) Geneious Basic: An integrated and
- 704 extendable desktop software platform for the organization and analysis of sequence data. *Bioinformatics* 28
- 705 (12):1647-1649. doi:10.1093/bioinformatics/bts199
- 706 Larsson A (2014) AliView: a fast and lightweight alignment viewer and editor for large datasets. *Bioinformatics*
- 707 30 (22):3276-3278. doi:10.1093/bioinformatics/btu531
- 708 Larsson K-H (2007) Re-thinking the classification of corticioid fungi. *Mycological research* 111 (9):1040-1063
- 709 Larsson K-H, Larsson E, Kõljalg U (2004) High phylogenetic diversity among corticioid homobasidiomycetes.
- 710 *Mycological research* 108 (09):983-1002
- 711 Leal-Dutra CA (2015) *Contribuições Taxonômicas e Filogenéticas ao Estudo de Pterulaceae (Agaricales)*
- 712 *Coraloides*. Universidade Federal de Santa Catarina, Florianópolis
- 713 Leal-Dutra CA, Neves MA, Griffith GW, Reck MA, Clasen LA, Dentinger BTM (2018) Reclassification of
- 714 *Parapterulicium* Corner (Pterulaceae, Agaricales), contributions to Lachnocladiaceae and Peniophoraceae
- 715 (Russulales) and introduction of *Baltazaria* gen. nov. *MycKeys* 37. doi:10.3897/mycokeys.37.26303
- 716 Liu YJ, Whelen S, Hall BD (1999) Phylogenetic relationships among ascomycetes: evidence from an RNA
- 717 polymerase II subunit. *Molecular biology and evolution* 16 (12):1799-1808
- 718 Lloyd CG (1919) *Mycological notes*. *Mycological Writings* 5 (60):15
- 719 Maas Geesteranus R (1964) Notes on Hydnums—II. *Persoonia-Molecular Phylogeny and Evolution of Fungi* 3
- 720 (2):155-192

- 721 Matheny PB (2005) Improving phylogenetic inference of mushrooms with RPB1 and RPB2 nucleotide  
722 sequences (Inocybe; Agaricales). *Molecular phylogenetics and evolution* 35 (1):1-20
- 723 Matheny PB, Curtis JM, Hofstetter V, Aime MC, Moncalvo J-M, Ge Z-W, Yang Z-L, Slot JC, Ammirati JF,  
724 Baroni TJ (2006) Major clades of Agaricales: a multilocus phylogenetic overview. *Mycologia* 98 (6):982-  
725 995
- 726 McLaughlin DJ, McLaughlin EG (1972) Pure Culture Studies of Fruiting and Sporulation in a Clavarioid  
727 Fungus, *Pterula* sp. *Mycologia* 64 (3):599-608. doi:10.2307/3757875
- 728 McLaughlin DJ, McLaughlin EG (1980) A new species of *Pterula* (Aphylophorales) with corticioid  
729 characteristics. *Canadian Journal of Botany* 58 (12):1327-1333. doi:10.1139/b80-163
- 730 McLaughlin EG, McLaughlin DJ, Adson DE (1978) Developmental anatomy of a dimitic basidiomycete,  
731 *Pterula* sp. *Canadian Journal of Botany* 56 (3):288-296. doi:10.1139/b78-036
- 732 Mueller UG, Kardish MR, Ishak HD, Wright AM, Solomon SE, Bruschi SM, Carlson AL, Bacci M (2018)  
733 Phylogenetic patterns of ant-fungus associations indicate that farming strategies, not only a superior fungal  
734 cultivar, explain the ecological success of leafcutter ants. *Molecular Ecology* 27 (10):2414-2434.  
735 doi:10.1111/mec.14588
- 736 Munkacsı A, Pan J, Villesen P, Mueller U, Blackwell M, McLaughlin D (2004) Convergent coevolution in the  
737 domestication of coral mushrooms by fungus-growing ants. *Proceedings of the Royal Society of London B:*  
738 *Biological Sciences* 271 (1550):1777-1782
- 739 Nguyen L-T, Schmidt HA, von Haeseler A, Minh BQ (2015) IQ-TREE: A Fast and Effective Stochastic  
740 Algorithm for Estimating Maximum-Likelihood Phylogenies. *Molecular biology and evolution* 32 (1):268-  
741 274. doi:10.1093/molbev/msu300
- 742 Pereira JS, Costa RR, Nagamoto NS, Forti LC, Pagnocca FC, Rodrigues A (2016) Comparative analysis of  
743 fungal communities in colonies of two leaf-cutting ant species with different substratum preferences.  
744 *Fungal Ecology* 21:68-75. doi:<https://doi.org/10.1016/j.funeco.2016.03.004>
- 745 Remsberg RE (1940) A New Species of *Pistillaria* on Rice Straw. *Mycologia* 32 (5):4.  
746 doi:10.1080/00275514.1940.12017444
- 747 Roberts P (1999) Clavarioid fungi from Korup National Park, Cameroon. *Kew Bulletin*:517-539
- 748 Saccardo PA, Saccardo D (1905) *Sylloge Fungorum*, vol XVII. Patavii, Italy
- 749 Schultz TR (2007) The fungus-growing ant genus *Apterostigma* in Dominican amber. In: Snelling R, BL Fisher,  
750 PS Ward (ed) *Advances in ant systematics (Hymenoptera: Formicidae): homage to E. O. Wilson – 50 years*

- 751 of contributions., vol 80. Memoirs of the American Entomological Institute. American Entomological  
752 Institute, Gainesville, FL, pp 425-436
- 753 Spegazzini C (1921) *Mycetes chilenses*. Boletín de la Academia Nacional de Ciencias en Córdoba 25:124
- 754 Index Herbariorum: A global directory of public herbaria and associated staff. (continuously updated)
- 755 <http://sweetgum.nybg.org/science/ih/>.
- 756 Vilgalys R, Hester M (1990) Rapid genetic identification and mapping of enzymatically amplified ribosomal  
757 DNA from several *Cryptococcus* species. Journal of Bacteriology 172 (8):4238-4246
- 758 Villesen P, Mueller UG, Schultz TR, Adams RM, Bouck AC (2004) Evolution of ant-cultivar specialization  
759 and cultivar switching in *Apterostigma* fungus-growing ants. Evolution 58 (10):2252-2265
- 760 Zhao C-L, Chen H, He S-H, Dai Y-C (2016) *Radulotubus resupinatus* gen. et sp. nov. with a poroid  
761 hymenophore in Pterulaceae (Agaricales, Basidiomycota). Nova Hedwigia 102 (3-4):3-4

762

763 **ADDITIONAL NOMENCLATURAL NOVELTIES**

764

765 *Phaeopterula anomala* (P. Roberts) Leal-Dutra, Dentinger, G.W. Griff., **comb. nov.**

766 MycoBank MB830999

767 Basionym: *Pterula anomala* P. Roberts, *Kew Bull.* 54(3): 528 (1999).

768 Description in Roberts (1999).

769

770 *Phaeopterula hirsuta* (Henn.) Sacc. & D. Sacc., *Syll. fung.* (Abellini) 17: 201 (1905)

771 MycoBank MB469044

772 Basionym: *Pterula hirsuta* Henn., in Warburg, *Monsunia* 1: 9 (1899) [1900].

773 Synonym: *Dendrocladium hirsutum* (Henn.) Lloyd, *Mycol. Writ.* 5: 870 (1919).

774 Description in Corner (1950).

775

776 *Phaeopterula juruensis* Henn. ex Sacc. & D. Sacc., *Syll. fung.* (Abellini) 17: 201 (1905)

777 MycoBank MB634235 (Fig. 10)

778 Basionym: *Pterula juruensis* Henn. [as '*Phaeopterula juruensis*'], *Hedwigia* 43(3): 175 (1904).

779 Synonym: *Dendrocladium juruense* (Henn.) Lloyd, *Mycol. Writ.* 5: 870 (1919).

780 Descriptions in Corner (1950, 1952b).

781

782 *Phaeopterula stipata* (Corner) Leal-Dutra, Dentinger, G.W. Griff., **comb. nov.**

783 MycoBank MB831000 (**Fig. 1N**)

784 Basionym: *Pterula stipata* Corner, *Ann. Bot.*, Lond., n.s. **16**: 568 (1952).

785 Description in Corner (1952b).

786

787 *Phaeopterula taxiformis* (Mont.) Leal-Dutra, Dentinger, G.W. Griff., **comb. nov.**

788 MycoBank MB831001

789 Basionym: *Pterula taxiformis* Mont., *Syll. gen. sp. crypt.* (Paris): 181 (1856).

790 Synonyms: *Lachnocladium taxiforme* (Mont.) Sacc., *Syll. fung.* (Abellini) **6**: 740 (1888). *Pterula humilis* Speg.,

791 *Revista Argent. Hist. Nat.* **1**(2): 110 (1891). *Pterula humilis* var. *tucumanensis* Speg., *Anal. Mus. nac. B. Aires*,

792 Ser. 3 **12**: 280 (1909).

793 Descriptions in Corner (1950, 1952b).

794

795 *Phaeopterula taxiformis* var. *gracilis* (Corner) Leal-Dutra, Dentinger, G.W. Griff., **comb. nov.**

796 MycoBank MB831002

797 Basionym: *Pterula taxiformis* var. *gracilis* Corner, *Ann. Bot.*, Lond., n.s. **16**: 568 (1952).

798 Description in Corner (1952b).

799

800 *Pterulicium argentinum* (Speg.) Leal-Dutra, Dentinger, G.W. Griff., **comb. nov.**

801 MycoBank MB831003

802 Basionym: *Mucronella argentina* Speg., *Anal. Mus. nac. Hist. nat. B. Aires* **6**: 178 (1898) [1899].

803 Synonyms: *Deflexula argentina* (Speg.) Corner, *Ann. Bot.*, Lond., n.s. **16**: 276 (1952). *Deflexula lilaceobrunnea*

804 var. *elongata* Corner, *Ann. Bot.*, Lond., n.s. **16**: 276 (1952).

805 Description in Corner (1952a, 1970)

806

807 *Pterulicium argentinum* var. *ramosum* (Corner) Leal-Dutra, Dentinger, G.W. Griff., **comb. nov.**

808 MycoBank MB831004

809 Basionym: *Deflexula argentina* (Speg.) Corner, *Ann. Bot.*, Lond., n.s. **16**: 276 (1952).

810 Description in Corner (1970).

811

812 *Pterulicium bambusae* (Corner) Leal-Dutra, Dentinger, G.W. Griff., **comb. nov.**

813 MycoBank MB831005

814 Basionym: *Pterula bambusae* Corner, *Beih. Nova Hedwigia* **33**: 209 (1970).

815 Description in Corner (1970).

816

817 *Pterulicium bromeliphilum* (Corner) Leal-Dutra, Dentinger, G.W. Griff., **comb. nov.**

818 MycoBank MB831006

819 Basionym: *Pterula bromeliphila* Corner, *Beih. Nova Hedwigia* **33**: 210 (1970).

820 Description in Corner (1970).

821

822 *Pterulicium brunneosetosum* (Corner) Leal-Dutra, Dentinger, G.W. Griff., **comb. nov.**

823 MycoBank MB831007

824 Basionym: *Pterula brunneosetosa* Corner, *Ann. Bot., Lond., n.s.* **16**: 566 (1952)

825 Descriptions in Corner (1952b, 1957, 1970).

826

827 *Pterulicium campoi* (Speg.) Leal-Dutra, Dentinger, G.W. Griff., **comb. nov.**

828 MycoBank MB831008

829 Basionym: *Pterula campoi* Speg., *Bol. Acad. nac. Cienc. Córdoba* **25**: 29 (1921).

830 Descriptions in Corner (1970) and Spegazzini (1921).

831

832 *Pterulicium caricis-pendulae* (Corner) Leal-Dutra, Dentinger, G.W. Griff., **comb. nov.**

833 MycoBank MB831009

834 Basionym: *Pterula caricis-pendulae* Corner, *Beih. Nova Hedwigia* **33**: 211 (1970).

835 Description in Corner (1970).

836

837 *Pterulicium crassisporum* (P. Roberts) Leal-Dutra, Dentinger, G.W. Griff., **comb. nov.**

838 MycoBank MB831010

839 Basionym: *Pterula crassispora* P. Roberts, *Kew Bull.* **54**(3): 531 (1999).

840 Description in Roberts (1999).

841

842 *Pterulicium cystidiatum* (Corner) Leal-Dutra, Dentinger, G.W. Griff., **comb. nov.**

843 MycoBank MB831011

844 Basionym: *Pterula cystidiata* Corner, *Ann. Bot., Lond.*, n.s. **16**: 567 (1952).

845 Description in Corner (1952b).

846

847 *Pterulicium debile* (Corner) Leal-Dutra, Dentinger, G.W. Griff., **comb. nov.**

848 MycoBank MB831012

849 Basionym: *Pterula bromeliphila* Corner, *Monograph of Clavaria and allied Genera*, (Annals of Botany

850 Memoirs No. 1): 698 (1950).

851 Description in (Corner 1950).

852

853 *Pterulicium echo* (D.J. McLaughlin & E.G. McLaughlin) Leal-Dutra, Dentinger, G.W. Griff., **comb. nov.**

854 MycoBank MB831013

855 Basionym: *Pterula echo* D.J. McLaughlin & E.G. McLaughlin, *Can. J. Bot.* **58**: 1328 (1980).

856 Description in McLaughlin and McLaughlin (1980).

857

858 *Pterulicium epiphylloides* (Corner) Leal-Dutra, Dentinger, G.W. Griff., **comb. nov.**

859 MycoBank MB831014

860 Basionym: *Pterula epiphylloides* Corner, *Ann. Bot., Lond.*, n.s. **16**: 567 (1952).

861 Description in Corner (1952b).

862

863 *Pterulicium epiphyllum* (Corner) Leal-Dutra, Dentinger, G.W. Griff., **comb. nov.**

864 MycoBank MB831015

865 Basionym: *Pterula epiphylla* Corner, *Monograph of Clavaria and allied Genera*, (Annals of Botany Memoirs

866 No. 1): 698 (1950).

867 Description in (Corner 1950).

868

869 *Pterulicium fasciculare* (Bres. & Pat.) Leal-Dutra, Dentinger, G.W. Griff., **comb. nov.**

870 MycoBank MB831016

- 871 Basionym: *Pterula fascicularis* Bres. & Pat., *Mycol. Writ.* **1**: 50 (1901).
- 872 Synonym: *Deflexula fascicularis* (Bres. & Pat.) Corner, *Monograph of Clavaria and allied Genera*, (Annals of
- 873 Botany Memoirs No. 1): 395 (1950).
- 874 Description in Corner (1950).
- 875
- 876 ***Pterulicium fluminense*** (Corner) Leal-Dutra, Dentinger, G.W. Griff., **comb. nov.**
- 877 MycoBank MB831017
- 878 Basionym: *Pterula fluminensis* Corner, *Ann. Bot.*, Lond., n.s. **16**: 567 (1952).
- 879 Descriptions in Corner (1952b, 1970).
- 880
- 881 ***Pterulicium gordium*** (Speg.) Leal-Dutra, Dentinger, G.W. Griff., **comb. nov.**
- 882 MycoBank MB831018
- 883 Basionym: *Clavaria gordius* Speg., *Anal. Soc. cient. argent.* **17**(2): 83 (1884).
- 884 Synonym: *Pterula gordius* (Speg.) Corner, *Monograph of Clavaria and allied Genera*, (Annals of Botany
- 885 Memoirs No. 1): 513 (1950).
- 886 Description in (Corner 1950).
- 887
- 888 ***Pterulicium gordium* var. *macrosporum*** (Corner) Leal-Dutra, Dentinger, G.W. Griff., **comb. nov.**
- 889 MycoBank MB831019
- 890 Basionym: *Pterula gordius* var. *macrospora* Corner, *Proc. Linn. Soc. London* **178**: 100 (1967).
- 891 Description in Corner (1967).
- 892
- 893 ***Pterulicium gracile*** (Desm. & Berk.) Leal-Dutra, Dentinger, G.W. Griff., **comb. nov.**
- 894 MycoBank MB831020
- 895 Basionym: *Typhula gracilis* Desm. & Berk., *Ann. nat. Hist., Mag. Zool. Bot. Geol.* **1**: 202 (1838).
- 896 Synonyms: *Pistillaria gracilis* (Desm. & Berk.) Pat., *Tab. analyt. Fung.* (Paris)(6): 30 (1886). *Hirsutella*
- 897 *gracilis* (Desm. & Berk.) Pat., *Revue mycol.*, Toulouse **14**(no. 54): 69 (1892). *Pterula gracilis* (Desm. & Berk.)
- 898 Corner, *Monograph of Clavaria and allied Genera*, (Annals of Botany Memoirs No. 1): 514 (1950). *Clavaria*
- 899 *aculina* Quél., *C. r. Assoc. Franç. Avancem. Sci.* **9**: 670 (1881) [1880]. *Pistillaria aculina* (Quél.) Pat., *Tab.*
- 900 *analyt. Fung.* (Paris)(6): 29 (fig. 570) (1886). *Ceratella aculina* (Quél.) Pat., *Hyménomyc. Eur.* (Paris): 157

- 901 (1887). *Cnazonaria aculina* (Quél.) Donk, *Meded. Bot. Mus. Herb. Rijks Univ. Utrecht* **9**: 97 (1933). *Pistillaria*  
902 *aculina* subsp. *juncicola* Bourdot & Galzin, *Hyménomyc. de France* (Sceaux): 138 (1928) [1927]. *Pistillaria*  
903 *aculina* subsp. *graminicola* Bourdot & Galzin, *Hyménomyc. de France* (Sceaux): 139 (1928) [1927]. *Pistillaria*  
904 *aculina* subsp. *acicula* Bourdot & Galzin, *Hyménomyc. de France* (Sceaux): 139 (1928) [1927]. *Typhula*  
905 *brunaudii* Quél., *C. r. Assoc. Franç. Avancem. Sci.* **13**: 283 (1885) [1884]. *Clavaria brunaudii* (Quél.) Sacc.,  
906 *Syll. fung.* (Abellini) **6**: 730 (1888). *Ceratella ferryi* Quél. & Fautrey, *Revue mycol.*, Toulouse **15**(no. 57): 15  
907 (1893). *Pistillaria ferryi* (Quél. & Fautrey) Sacc., *Syll. fung.* (Abellini) **11**: 141 (1895). *Pistillaria ferryi* subsp.  
908 *tremula* Sacc., *Syll. fung.* (Abellini) **17**: 202 (1905). *Mucronella rickii* Oudem., *Ned. kruidk. Archf.*, 3 sér. **2**(3):  
909 667 (1902). *Cnazonaria rickii* (Oudem.) Donk, *Meded. Bot. Mus. Herb. Rijks Univ. Utrecht* **9**: 99 (1933).  
910 *Ceratelopsis rickii* (Oudem.) Corner, *Monograph of Clavaria and allied Genera*, (Annals of Botany Memoirs  
911 No. 1): 205 (1950).  
912 Description in (Corner 1950).  
913  
914 ***Pterulicium incarnatum*** (Pat.) Leal-Dutra, Dentinger, G.W. Griff., **comb. nov.**  
915 MycoBank MB831021  
916 Basionym: *Pterula incarnata* Pat., in Patouillard & Lagerheim, *Bull. Herb. Boissier* **3**(1): 58 (1895)  
917 Description in (Corner 1950, 1970)  
918  
919 ***Pterulicium intermedium*** (Dogma) Leal-Dutra, Dentinger, G.W. Griff., **comb. nov.**  
920 MycoBank MB831022  
921 Basionym: *Pterula intermedia* Dogma, *Philipp. Agric.* **49**: 852 (1966)  
922 Descriptions in (Corner 1970) and Dogma (1966)  
923  
924 ***Pterulicium laxum*** (Pat.) Leal-Dutra, Dentinger, G.W. Griff., **comb. nov.**  
925 MycoBank MB831023  
926 Basionym: *Pterula laxa* Pat., *Bull. Soc. mycol. Fr.* **18**(2): 175 (1902).  
927 Description in (Corner 1950, 1970) Pat. 1902  
928  
929 ***Pterulicium lilaceobrunneum*** (Corner) Leal-Dutra, Dentinger, G.W. Griff., **comb. nov.** (**Fig. 1K**)  
930 MycoBank MB831024



- 931 Basionym: *Deflexula lilaceobrunnea* Corner, *Monograph of Clavaria and allied Genera*, (Annals of Botany  
932 Memoirs No. 1): 695 (1950).  
933 Description in Corner (1952a).  
934  
935 ***Pterulicium lilaceobrunneum* var. *evolutius*** (Corner) Leal-Dutra, Dentinger, G.W. Griff., **comb. nov.**  
936 MycoBank MB831025  
937 Basionym: *Deflexula lilaceobrunnea* var. *evolutior* Corner, *Beih. Nova Hedwigia* **33**: 197 (1970).  
938 Description in Corner (1970).  
939  
940 ***Pterulicium longisporum*** (Corner) Leal-Dutra, Dentinger, G.W. Griff., **comb. nov.**  
941 MycoBank MB831026  
942 Basionym: *Pterula longispora* Corner, *Ann. Bot.*, Lond., n.s. **16**: 567 (1952)  
943 Description in (Corner 1952b).  
944  
945 ***Pterulicium macrosporum*** (Pat.) Leal-Dutra, Dentinger, G.W. Griff., **comb. nov.**  
946 MycoBank MB831027  
947 Basionym: *Ceratella macrospora* Pat., in Patouillard & Lagerheim, *Bull. Soc. mycol. Fr.* **8**(3): 119 (1892).  
948 Synonyms: *Pistillaria macrospora* (Pat.) Sacc., *Syll. fung.* (Abellini) **11**: 142 (1895). *Pterula macrospora* (Pat.)  
949 Corner, *Monograph of Clavaria and allied Genera*, (Annals of Botany Memoirs No. 1): 518 (1950).  
950 Description in (Corner 1950, 1970). Pat 1892  
951  
952 ***Pterulicium majus*** (Corner) Leal-Dutra, Dentinger, G.W. Griff., **comb. nov.**  
953 MycoBank MB831028  
954 Basionym: *Deflexula major* Corner, *Ann. Bot.*, Lond., n.s. **16**: 277 (1952).  
955 Description in Corner (1952a).  
956  
957 ***Pterulicium mangiforme*** (Corner) Leal-Dutra, Dentinger, G.W. Griff., **comb. nov.**  
958 MycoBank MB831029  
959 Basionym: *Deflexula mangiformis* Corner, *Ann. Bot.*, Lond., n.s. **16**: 278 (1952).  
960 Description in Corner (1952a).

961

962 *Pterulicium microsporum* (Corner) Leal-Dutra, Dentinger, G.W. Griff., **comb. nov.**

963 MycoBank MB831030

964 Basionym: *Deflexula microspora* Corner, *Bull. Jard. bot. État Brux.* **36**: 264 (1966).

965 Description in Corner (1966).

966

967 *Pterulicium nanum* (Pat.) Leal-Dutra, Dentinger, G.W. Griff., **comb. nov.**

968 MycoBank MB831031

969 Basionym: *Pterula nana* Pat., *Bull. Soc. mycol. Fr.* **18**(2): 175 (1902).

970 Synonyms: *Deflexula nana* (Pat.) Corner, *Bull. Jard. bot. État Brux.* **36**: 264 (1966). *Pterula vanderystii* Henn.

971 [as '*vanderysti*'], *Ann. Mus. Congo Belge, Bot., Sér. 5* **2**(2): 96 (1907). *Deflexula vanderystii* (Henn.) Corner,

972 *Ann. Bot., Lond., n.s.* **16**: 284 (1952).

973 Description in Corner (1966).

974

975 *Pterulicium naviculum* (Corner) Leal-Dutra, Dentinger, G.W. Griff., **comb. nov.**

976 MycoBank MB831032

977 Basionym: *Pterula navicula* Corner, *Ann. Bot., Lond., n.s.* **16**: 568 (1952).

978 Description in (Corner 1952b).

979

980 *Pterulicium oryzae* (Remsberg) Leal-Dutra, Dentinger, G.W. Griff., **comb. nov.**

981 MycoBank MB831033

982 Basionym: *Pistillaria oryzae* Remsberg, *Mycologia* **32**(5): 668 (1940).

983 Synonym: *Pterula oryzae* (Remsberg) Corner, *Monograph of Clavaria and allied Genera*, (Annals of Botany

984 Memoirs No. 1): 519 (1950).

985 Descriptions in (Corner 1950) and Remsberg (1940)

986

987 *Pterulicium phylloicola* (Corner) Leal-Dutra, Dentinger, G.W. Griff., **comb. nov.**

988 MycoBank MB831034

989 Basionym: *Pterula phylloicola* Corner, *Beih. Nova Hedwigia* **33**: 220 (1970).

990 Description in Corner (1970)

- 991
- 992 *Pterulicium phyllophilum* (McAlpine) Leal-Dutra, Dentinger, G.W. Griff., **comb. nov.**
- 993 MycoBank MB831035
- 994 Basionym: *Clavaria phyllophila* McAlpine, *Agric. Gaz. N.S.W.*, Sydney **7**: 86 (1896).
- 995 Synonym: *Pterula phyllophila* (McAlpine) Corner, *Monograph of Clavaria and allied Genera*, (Annals of
- 996 Botany Memoirs No. 1): 520 (1950).
- 997 Description in (Corner 1950).
- 998
- 999 *Pterulicium rigidum* (Donk) Leal-Dutra, Dentinger, G.W. Griff., **comb. nov.**
- 1000 MycoBank MB831036
- 1001 Basionym: *Pterula rigida* Donk, *Monograph of Clavaria and allied Genera*, (Annals of Botany Memoirs No.
- 1002 1): 698 (1950).
- 1003 Description in Corner (1950)
- 1004
- 1005 *Pterulicium sclerotiicola* (Berthier) Leal-Dutra, Dentinger, G.W. Griff., **comb. nov.**
- 1006 MycoBank MB831037
- 1007 Basionym: *Pterula sclerotiicola* Berthier, *Bull. trimest. Soc. mycol. Fr.* **83**: 731 (1968) [1967]
- 1008 Description in Corner (1970)
- 1009
- 1010 *Pterulicium secundirameum* (Lév) Leal-Dutra, Dentinger, G.W. Griff., **comb. nov.** (**Fig. 11**)
- 1011 MycoBank MB831038
- 1012 Basionym: *Clavaria secundiramea* Lév., *Annls Sci. Nat., Bot.*, sér. 3 **2**: 216 (1844).
- 1013 Synonyms: *Pterula secundiramea* (Lév.) Speg., *Bol. Acad. nac. Cienc. Córdoba* **11**(4): 466 (1889). *Deflexula*
- 1014 *secundiramea* (Lév.) Corner, *Beih. Nova Hedwigia* **33**: 199 (1970). *Pterula palmicola* Corner, *Ann. Bot., Lond.*,
- 1015 n.s. **16**: 568 (1952) **syn. nov.**
- 1016 Descriptions in Corner (1950, 1952b).
- 1017 Notes
- 1018 The synonymisation of *Pm. palmicola* (samples M50 and M83) in *Pm. secundirameum* (samples M70 and
- 1019 genome5) is based on our phylogenetic results and morphological comparisons. The only morphological

1020 difference between the two species is the shape of the basidiome, however, the other characters are similar and  
1021 both species are nested together within our tree (Additional file 2).

1022

1023 *Pterulicium sprucei* (Mont.) Leal-Dutra, Dentinger, G.W. Griff., **comb. nov.** (Fig. 1L)

1024 MycoBank MB831039

1025 Basionym: *Hydnum sprucei* Mont., *Syll. gen. sp. crypt.* (Paris): 173 (1856).

1026 Synonyms: *Pterula sprucei* (Mont.) Lloyd, *Mycol. Writ.* **5**: 865 (1919). *Deflexula sprucei* (Mont.) Maas Geest.,

1027 *Persoonia* **3**(2): 179 (1964). *Pterula pennata* Henn., *Hedwigia* **43**(3): 174 (1904). *Deflexula pennata* (Henn.)

1028 Corner, *Ann. Bot.*, Lond., n.s. **16**: 278 (1952).

1029 Description in Corner (1952a) as *D. pennata*, Corner (1970) and Maas Geesteranus (1964).

1030

1031 *Pterulicium subsimplex* (Henn.) Leal-Dutra, Dentinger, G.W. Griff., **comb. nov.**

1032 MycoBank MB831040

1033 Basionym: *Pterula subsimplex* Henn., *Hedwigia* **36**(4): 197 (1897).

1034 Synonyms: *Deflexula subsimplex* (Henn.) Corner, *Ann. Bot.*, Lond., n.s. **16**: 279 (1952). *Pterula nivea* Pat., *Bull.*

1035 *Soc. mycol. Fr.* **18**(2): 174 (1902). *Deflexula nivea* (Pat.) Corner, *Monograph of Clavaria and allied Genera*,

1036 (Annals of Botany Memoirs No. 1): 398 (1950). *Mucronella pacifica* Kobayasi, *Bot. Mag.*, Tokyo **53**: 160

1037 (1939). *Deflexula pacifica* (Kobayasi) Corner, *Monograph of Clavaria and allied Genera*, (Annals of Botany

1038 Memoirs No. 1): 399 (1950).

1039 Descriptions in Corner (1952a) and Corner (1950) as *D. pacifica*.

1040

1041 *Pterulicium subsimplex* var. *multifidum* (Corner) Leal-Dutra, Dentinger, G.W. Griff., **comb. nov.**

1042 MycoBank MB831041

1043 Basionym: *Deflexula subsimplex* var. *multifida* Corner, *Ann. Bot.*, Lond., n.s. **16**: 282 (1952).

1044 Description in Corner (1952a).

1045

1046 *Pterulicium subtyphuloides* (Corner) Leal-Dutra, Dentinger, G.W. Griff., **comb. nov.**

1047 MycoBank MB831042

1048 Basionym: *Pterula subtyphuloides* Corner, *Monograph of Clavaria and allied Genera*, (Annals of Botany

1049 Memoirs No. 1): 698 (1950).

- 1050 Description in Corner (1950).
- 1051
- 1052 *Pterulicium sulcisporum* (Corner) Leal-Dutra, Dentinger, G.W. Griff., **comb. nov.**
- 1053 MycoBank MB831043
- 1054 Basionym: *Deflexula sulcisporea* Corner, *Ann. Bot., Lond., n.s.* **16**: 283 (1952).
- 1055 Description in Corner (1952a).
- 1056
- 1057 *Pterulicium tenuissimum* (M.A. Curtis) Leal-Dutra, Dentinger, G.W. Griff., **comb. nov.**
- 1058 MycoBank MB831044
- 1059 Basionym: *Typhula tenuissima* M.A. Curtis, *Am. Journ. Art. Scienc.* **6**: 351 (1848).
- 1060 Synonym: *Pterula tenuissima* (M.A. Curtis) Corner, *Monograph of Clavaria and allied Genera*, (Annals of
- 1061 Botany Memoirs No. 1): 524 (1950).
- 1062 Description in Corner (1950).
- 1063
- 1064 *Pterulicium ulmi* (Peck) Leal-Dutra, Dentinger, G.W. Griff., **comb. nov.**
- 1065 MycoBank MB831045
- 1066 Basionym: *Mucronella ulmi* Peck, *Ann. Rep. Reg. N.Y. St. Mus.* **54**: 154 (1902) [1901].
- 1067 Synonym: *Deflexula ulmi* (Peck) Corner, *Monograph of Clavaria and allied Genera*, (Annals of Botany
- 1068 Memoirs No. 1): 400 (1950).
- 1069 Description in Corner (1950, 1970).
- 1070
- 1071 *Pterulicium velutipes* (Corner) Leal-Dutra, Dentinger, G.W. Griff., **comb. nov.**
- 1072 MycoBank MB831046
- 1073 Basionym: *Pterula velutipes* Corner, *Ann. Bot., Lond., n.s.* **16**: 569 (1952).
- 1074 Description in Corner (1952b).
- 1075
- 1076
- 1077

1078 **Captions for Figures and Additional files:**

1079

1080 **Fig. 1** Diversity of coralloid genera of Pterulaceae. A-F: *Myrmecopterula* (A: *Apterostigma* sp. nest with *M.*  
1081 *velohortorum* with *Myrmecopterula* sp. SAPV1 growing atop of the garden veil; B, C, F: *Myrmecopterula* sp.  
1082 D: *Apterostigma* sp. nest with *M. nudihortorum*; E: *M. moniliformis*). G-H: *Pterula* (G: *P. cf. lorentensis*; H: *P.*  
1083 *cf. verticillata*). I-L: *Pterulicium* (I: *P. secundirameum*; J: *P. aff. fluminensis*; K: *P. lilaceobrunneum*. L: *P.*  
1084 *sprucei*). M-O: *Phaeopterula* (M: *Phaeopterula* sp.; N: *P. stipata*; O: *P. juruensis*). Close observation on photos  
1085 B and C reveal the basidiomes growing from granular substrate resembling substrate of ants' fungus garden.  
1086 Photos D and G kindly provided by Ted Schultz and Michael Wherley respectively. Scale bars: 1 cm.

1087

1088 **Fig. 2** Corticioid genera of Pterulaceae (A-C) and Radulomycetaceae (D-F). A: *Coronicium alboglaucum*. B-C:  
1089 *Merulicium fusisporum*. D: *Radulomyces confluens*. E: *Radulotubus resupinatus*. F: *Aphanobasidium cf.*  
1090 *pseudotsugae*. Photos kindly provided by L. Zibarová (A and F), S. Blaser (B and C), D.J. Harries (D) and C.L.  
1091 Zhao (E). Scale bars: 1 cm.

1092

1093 **Fig. 3** Maximum-likelihood tree of Pterulaceae and Radulomycetaceae. Support values on the branches are  
1094 UFBoot/BPP and showed only for UFBoot $\geq$ 70 and BPP $\geq$ 0.70 and branch length  $\geq$  0.003 substitutions per site.  
1095 Details for the complete tree can be found in Additional file 2 and TreeBase (ID: 24428). Scale bar: nucleotide  
1096 substitutions per site.

1097

1098

1099 **Additional file 1:** Full details of all samples studied here (simplified in Table2; as excel file)

1100

1101 **Additional file 2:** Additional phylogenetic reconstructions, including detailed analyses relating to Figure 3

1102

1103 **Additional file 3:** Additional images of coralloid Pterulaceae and micrographs of *Myrmecopterula*  
1104 *velohortorum*.

1105

1106 **Table 2:** Details of new sequences generated in this study used in the tree of Fig. 3. (a full version is presented as excel file in Additional file 1).

| Taxon (former genus in brackets)             | DNA sample ID    | Herbarium voucher | Country | Region         | ITS      | LSU      | RPB2     |
|----------------------------------------------|------------------|-------------------|---------|----------------|----------|----------|----------|
| <i>Coronicium alboglaucum</i>                | K15              | K(M) 170129       | UK      | England        | MK953245 | –        | –        |
| <i>Coronicium gemmiferum</i>                 | K13              | K(M) 133847       | UK      | England        | MK953246 | –        | –        |
| <i>Coronicium gemmiferum</i>                 | K14              | K(M) 68853        | UK      | England        | MK953247 | MK953403 | –        |
| <i>Merulicium fusisporum</i>                 | K16              | K(M) 45181        | UK      | England        | MK953248 | –        | –        |
| <i>Myrmecopterula (Pterula) moniliformis</i> | F92 Consensus 1  | INPA 280127       | Brazil  | Amazonas       | MK953251 | MK953405 | MK944362 |
| <i>Myrmecopterula (Pterula) moniliformis</i> | M39              | FLOR 56397        | Brazil  | Paraíba        | MK953253 | MK953406 | –        |
| <i>Myrmecopterula (Pterula) moniliformis</i> | MCA              | not deposited     | –       | –              | MK953239 | MK953392 | MK944363 |
| <i>Myrmecopterula (Pterula) nudihortorum</i> | F144 Consensus 1 | not deposited     | Brazil  | Amazonas       | MK953257 | MK953393 | MK944364 |
| <i>Myrmecopterula (Pterula) nudihortorum</i> | KM190547_VC1     | K(M) 190547       | Panama  | –              | MK953240 | MK953394 | MK944365 |
| <i>Myrmecopterula (Pterula) sp.</i>          | F103             | HSTM-Fungos 9931  | Brazil  | Pará           | MK953260 | MK953407 | MK944325 |
| <i>Myrmecopterula (Pterula) sp.</i>          | F138             | FLOR 63724        | Brazil  | Paraná         | MK953262 | MK953409 | –        |
| <i>Myrmecopterula (Pterula) sp.</i>          | F40              | FLOR 63725        | Brazil  | Paraná         | MK953264 | MK953410 | MK944327 |
| <i>Myrmecopterula (Pterula) sp.</i>          | F82 Consensus 1  | not deposited     | Brazil  | Amazonas       | MK953269 | MK953412 | MK944366 |
| <i>Myrmecopterula (Pterula) sp.</i>          | F94              | HSTM-Fungos 9928  | Brazil  | Pará           | MK953274 | MK953414 | MK944329 |
| <i>Myrmecopterula (Pterula) sp.</i>          | F99              | HSTM-Fungos 9930  | Brazil  | Pará           | MK953276 | MK953415 | MK944330 |
| <i>Myrmecopterula (Pterula) sp.</i>          | M111             | FLOR 56451        | Brazil  | Santa Catarina | MK953277 | –        | –        |
| <i>Myrmecopterula (Pterula) sp.</i>          | M40 Consensus 1  | FLOR 56398; K(M)  | Brazil  | Paraíba        | MK953280 | MK953416 | MK944367 |

205347

|                                              |                  |                  |          |                   |          |          |          |
|----------------------------------------------|------------------|------------------|----------|-------------------|----------|----------|----------|
| <i>Myrmecopterula (Pterula) sp.</i>          | M69              | FLOR 56418       | Brazil   | Rio Grande do Sul | MK953281 | MK953395 | MK944368 |
| <i>Myrmecopterula (Pterula) velohortorum</i> | F114             | not deposited    | Brazil   | Espírito Santo    | MK953282 | MK953396 | MK944369 |
| <i>Myrmecopterula (Pterula) velohortorum</i> | F117             | not deposited    | Brazil   | Santa Catarina    | MK953283 | –        | –        |
| <i>Myrmecopterula (Pterula) velohortorum</i> | F135             | not deposited    | Brazil   | Pará              | MK953285 | –        | –        |
| <i>Myrmecopterula (Pterula) velohortorum</i> | F136             | not deposited    | Brazil   | Pará              | MK953286 | –        | –        |
| <i>Myrmecopterula (Pterula) velohortorum</i> | F137             | not deposited    | Brazil   | Pará              | MK953287 | –        | –        |
| <i>Myrmecopterula (Pterula) velohortorum</i> | F140 Clone 1     | not deposited    | Brazil   | Amazonas          | MK953288 | –        | –        |
| <i>Myrmecopterula (Pterula) velohortorum</i> | F152             | not deposited    | Brazil   | Santa Catarina    | MK953290 | –        | –        |
| <i>Myrmecopterula (Pterula) velohortorum</i> | KM190546         | K(M) 190546      | Panama   | –                 | MK953242 | MK953397 | MK944370 |
| <i>Myrmecopterula (Pterula) velohortorum</i> | RC12 Consensus 1 | not deposited    | Brazil   | Amazonas          | MK953291 | –        | –        |
| <i>Phaeopterula (Pterula) anomala</i>        | KM38182          | K(M) 38182       | Cameroon | –                 | MK953295 | –        | –        |
| <i>Phaeopterula (Pterula) cf. juruensis</i>  | F45 Consensus 1  | FLOR 63732       | Brazil   | Paraná            | MK953296 | MK953417 | MK944331 |
| <i>Phaeopterula (Pterula) cf. juruensis</i>  | F79 Consensus 1  | FLOR 63717       | Brazil   | Paraná            | MK953299 | MK953418 | –        |
| <i>Phaeopterula (Pterula) cf. stipata</i>    | F66 Consensus 1  | HSTM-Fungos 9938 | Brazil   | Pará              | MK953301 | –        | –        |
| <i>Phaeopterula (Pterula) cf. stipata</i>    | F98 Consensus 1  | HSTM-Fungos 9929 | Brazil   | Pará              | MK953302 | –        | –        |
| <i>Phaeopterula (Pterula) cf. taxiformis</i> | M4               | FLOR 56367       | Brazil   | Santa Catarina    | MK953303 | MK953419 | –        |
| <i>Phaeopterula (Pterula) juruensis</i>      | F41              | FLOR 63728       | Brazil   | Paraná            | MK953304 | MK953420 | MK944332 |
| <i>Phaeopterula (Pterula) juruensis</i>      | M21              | FLOR 56381       | Brazil   | Minas Gerais      | MK953305 | –        | –        |



|                                         |                  |                  |             |                |          |          |          |
|-----------------------------------------|------------------|------------------|-------------|----------------|----------|----------|----------|
| <i>Phaeopterula (Pterula) juruensis</i> | M36              | FLOR 56396       | Brazil      | Santa Catarina | MK953307 | MK953422 | –        |
| <i>Phaeopterula (Pterula) sp.</i>       | F63 Consensus 1  | HSTM-Fungos 9935 | Brazil      | Pará           | MK953316 | MK953425 | MK944335 |
| <i>Phaeopterula (Pterula) sp.</i>       | F78 Clone 1      | FLOR 63716       | Brazil      | Paraná         | MK953321 | MK953428 | MK944338 |
| <i>Phaeopterula (Pterula) sp.</i>       | KM135954         | K(M) 135954      | Belize      | –              | MK953326 | –        | –        |
| <i>Phaeopterula (Pterula) sp.</i>       | KM137475         | K(M) 137475      | Puerto Rico | –              | MK953327 | –        | –        |
| <i>Phaeopterula (Pterula) stipata</i>   | M15 Consensus 1  | FLOR 56375       | Brazil      | Minas Gerais   | MK953330 | MK953431 | –        |
| <i>Phaeopterula sp. (Allantula?)</i>    | F7 Consensus 1   | HSTM-Fungos 9944 | Brazil      | Pará           | MK953331 | MK953432 | MK944339 |
| <i>Pterula cf plumosa</i>               | KM167176         | K(M) 167176      | Ethiopia    | –              | MK953333 | –        | –        |
| <i>Pterula cf. lorentensis</i>          | RLC273           | K(M) 205553      | Ecuador     | Imbabura       | MK953334 | MK953398 | MK944371 |
| <i>Pterula multifida</i>                | KM195746         | K(M) 195746      | UK          | England        | MK953335 | MK953399 | MK944372 |
| <i>Pterula sp.</i>                      | F42              | FLOR 63729       | Brazil      | Paraná         | MK953336 | MK953433 | –        |
| <i>Pterula sp.</i>                      | F48              | FLOR 63735       | Brazil      | Paraná         | –        | MK953434 | –        |
| <i>Pterula sp.</i>                      | M112 Consensus 1 | FLOR 56452       | Brazil      | Santa Catarina | MK953337 | MK953435 | MK944340 |
| <i>Pterula sp.</i>                      | M153             | FLOR 57849       | Brazil      | Santa Catarina | MK953339 | MK953436 | MK944341 |
| <i>Pterula sp.</i>                      | M54              | FLOR 56407       | Brazil      | Santa Catarina | MK953341 | MK953438 | –        |
| <i>Pterula sp.</i>                      | M71 Consensus 1  | FLOR 56424       | Brazil      | Santa Catarina | MK953342 | MK953439 | MK944342 |
| <i>Pterula sp.</i>                      | KM141379         | K(M) 141379      | Puerto Rico | –              | MK953344 | –        | –        |
| <i>Pterula sp.</i>                      | KM167221         | K(M) 167221      | Australia   | Queensland     | MK953345 | –        | –        |
| <i>Pterula subulata</i>                 | KM145950         | K(M) 145950      | Italy       | –              | MK953346 | –        | –        |

|                                                |                 |                  |              |                |          |          |          |
|------------------------------------------------|-----------------|------------------|--------------|----------------|----------|----------|----------|
| <i>Pterula subulata</i>                        | KM167186        | K(M) 167186      | Sweden       | –              | MK953347 | –        | –        |
| <i>Pterula verticillata</i>                    | KM27119         | K(M) 27119       | Brunei       | –              | MK953348 | –        | –        |
| <i>Pterulicium (Deflexula) fasciculare</i>     | KM167225        | K(M) 167225      | Australia    | –              | MK953349 | –        | –        |
| <i>Pterulicium (Deflexula) fasciculare</i>     | KM167227        | K(M) 167227      | Malaysia     | –              | MK953350 | –        | –        |
| <i>Pterulicium (Deflexula) lilaceobrunneum</i> | M117            | FLOR 56455       | Brazil       | Rio de Janeiro | MK953351 | MK953440 | MK944343 |
| <i>Pterulicium (Deflexula) secundirameum</i>   | BZL44           | RB 575791        | Brazil       | Rio de Janeiro | MK953353 | MK953400 | MK944373 |
| <i>Pterulicium (Deflexula) secundirameum</i>   | M50             | FLOR 56403       | Brazil       | Santa Catarina | MK953354 | MK953442 | MK944344 |
| <i>Pterulicium (Deflexula) sp.</i>             | KM167228        | K(M) 167228      | Malaysia     | –              | MK953357 | –        | –        |
| <i>Pterulicium (Deflexula) sp.</i>             | KM167233        | K(M) 167233      | Sierra Leone | –              | MK953358 | –        | –        |
| <i>Pterulicium (Deflexula) sprucei</i>         | F68             | HSTM-Fungos 9940 | Brazil       | Pará           | MK953361 | MK953447 | MK944349 |
| <i>Pterulicium (Deflexula) subsimplex</i>      | KM160100        | K(M) 160100      | Ecuador      | –              | –        | MK953449 | –        |
| <i>Pterulicium (Deflexula) subsimplex</i>      | M33             | FLOR 56393       | Brazil       | Santa Catarina | MK953363 | MK953450 | MK944351 |
| <i>Pterulicium (Pterula) brunneosetosum</i>    | M35 Consensus 1 | FLOR 56395       | Brazil       | Santa Catarina | MK953366 | MK953452 | MK944353 |
| <i>Pterulicium (Pterula) caricispendulae</i>   | KM155784        | K(M) 155784      | UK           | England        | MK953367 | –        | –        |
| <i>Pterulicium (Pterula) sp.</i>               | F20             | INPA 280129      | Brazil       | Amazonas       | MK953370 | MK953454 | –        |
| <i>Pterulicium (Pterula) sp.</i>               | F21             | INPA 280132      | Brazil       | Amazonas       | MK953371 | MK953455 | MK944355 |
| <i>Pterulicium (Pterula) sp.</i>               | F26             | not deposited    | Brazil       | Espírito Santo | MK953372 | MK953456 | MK944356 |
| <i>Pterulicium (Pterula) sp.</i>               | F30             | not deposited    | Brazil       | Espírito Santo | MK953373 | MK953457 | MK944357 |
| <i>Pterulicium (Pterula) sp.</i>               | F57             | HSTM-Fungos 9925 | Brazil       | Pará           | MK953376 | MK953460 | MK944359 |

|                                           |                 |                  |            |                |          |          |          |
|-------------------------------------------|-----------------|------------------|------------|----------------|----------|----------|----------|
| <i>Pterulicium (Pterula) sp.</i>          | F76 Consensus 1 | HSTM-Fungos 9950 | Brazil     | Pará           | MK953382 | MK953461 | MK944360 |
| <i>Pterulicium (Pterula) sp.</i>          | M1              | FLOR 56364       | Brazil     | Santa Catarina | MK953383 | MK953462 | MK944361 |
| <i>Pterulicium (Pterula) sp.</i>          | M6              | FLOR 56369       | Brazil     | Santa Catarina | MK953384 | MK953463 | –        |
| <i>Pterulicium (Pterulicium) xyloenum</i> | KM167222        | K(M) 167222      | Bangladesh | –              | MK953387 | –        | –        |
| <i>Aphanobasidium pseudotsugae</i>        | K6              | K(M) 170662      | UK         | England        | MK953243 | MK953402 | –        |
| <i>Aphanobasidium pseudotsugae</i>        | K7              | K(M) 180787      | UK         | Scotland       | MK953244 | –        | –        |
| <i>Radulomyces confluens</i>              | KM167249        | K(M) 167249      | Brazil     | –              | MK953388 | –        | –        |
| <i>Radulomyces confluens</i>              | KM167250        | K(M) 167250      | Argentina  | –              | MK953389 | –        | –        |
| <i>Radulomyces confluens</i>              | KM181613        | K(M) 181613      | UK         | England        | MK953390 | MK953401 | MK944374 |
| <i>Radulomyces copelandii</i>             | M150            | K(M) 173275      | USA        | –              | MK953391 | MK953465 | –        |

1107

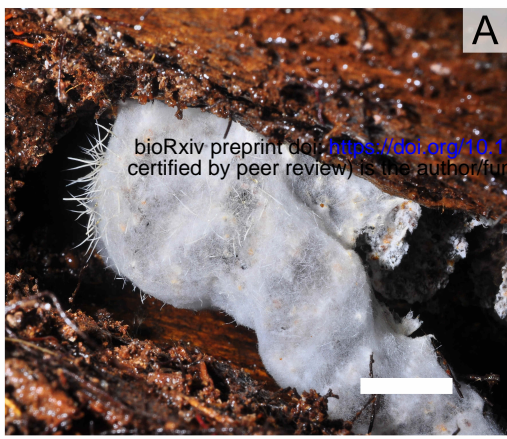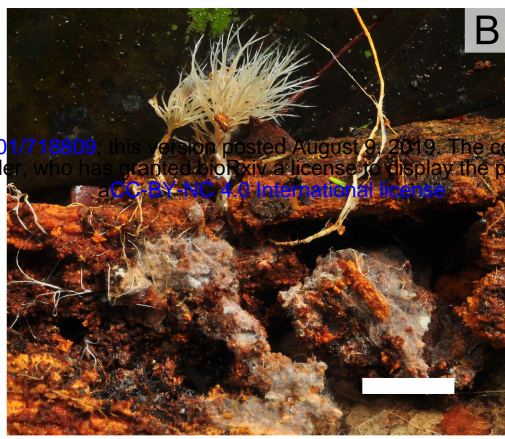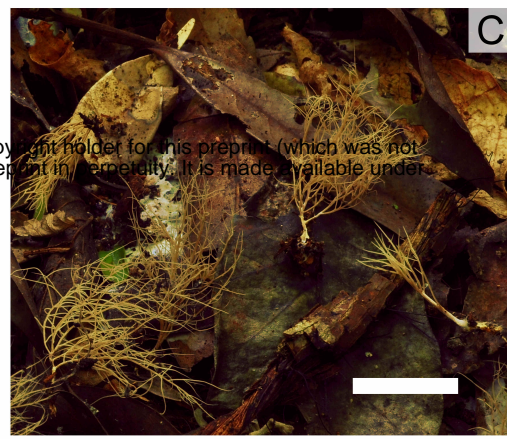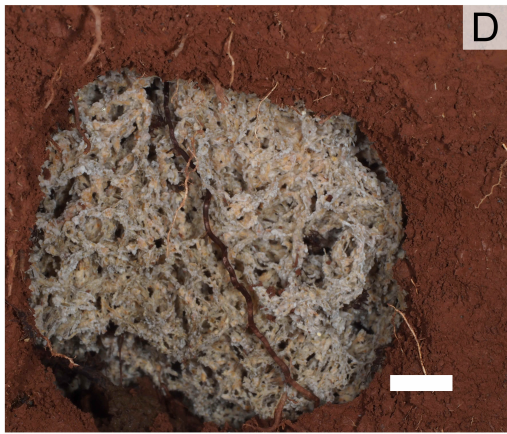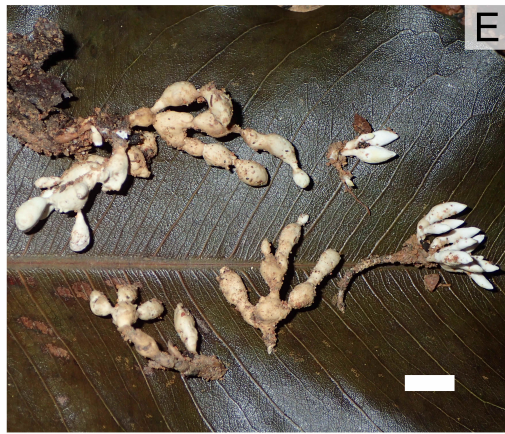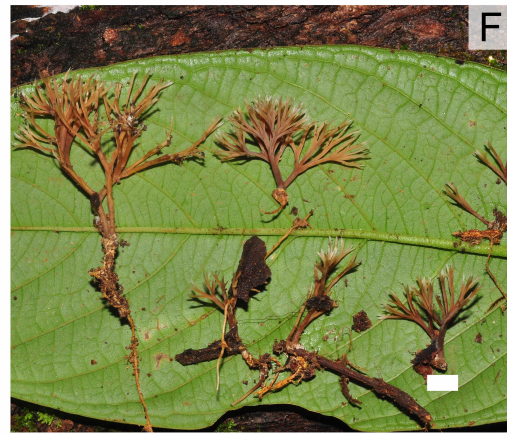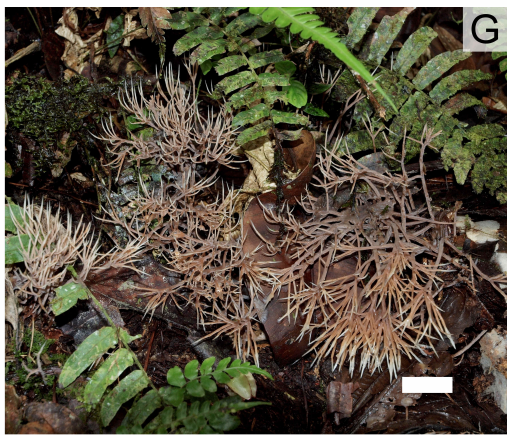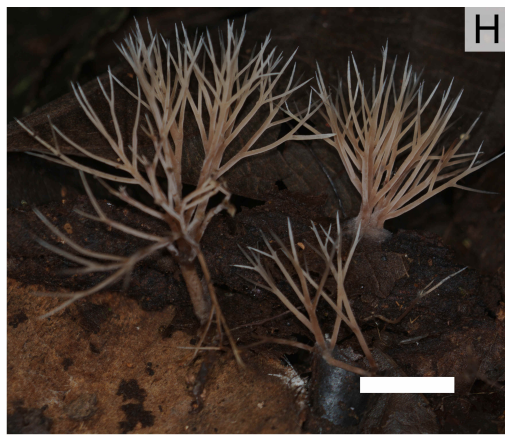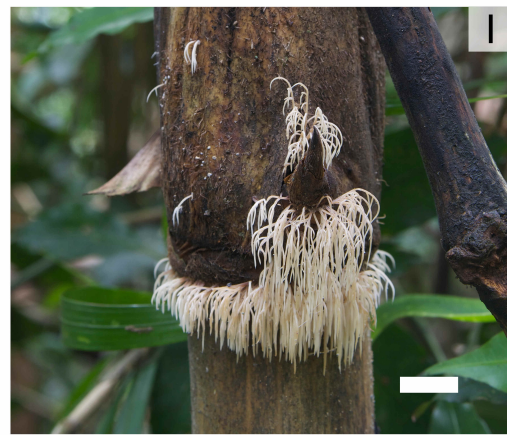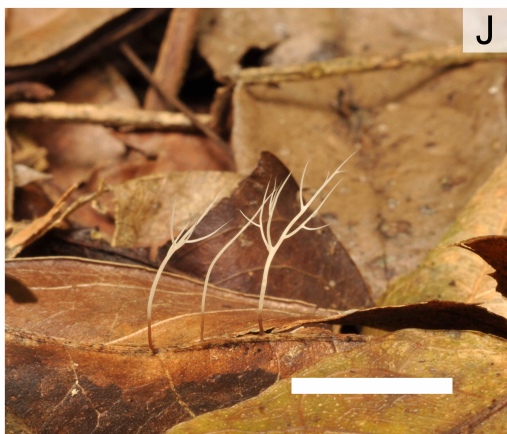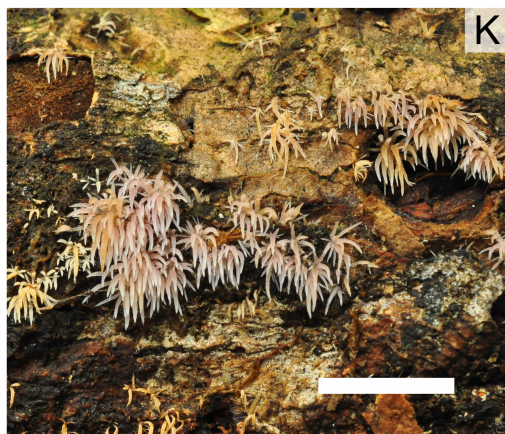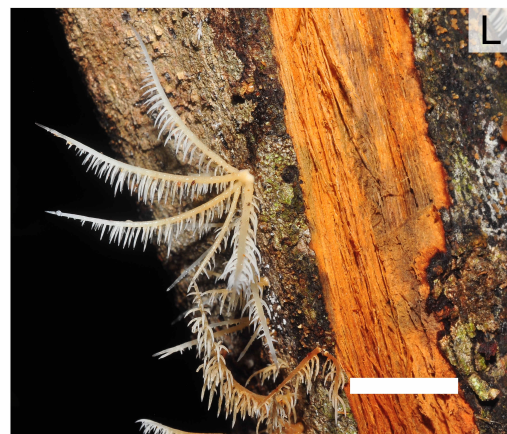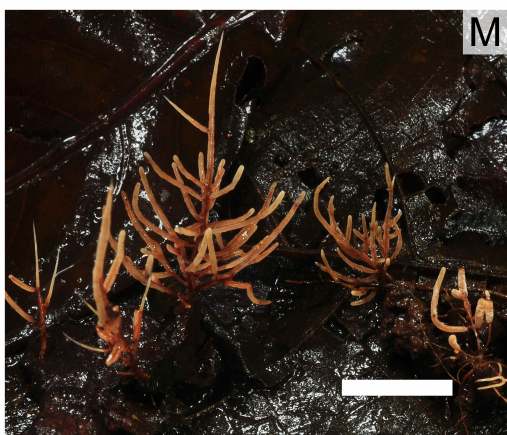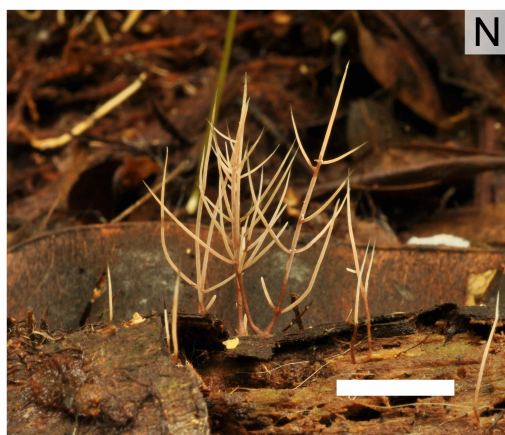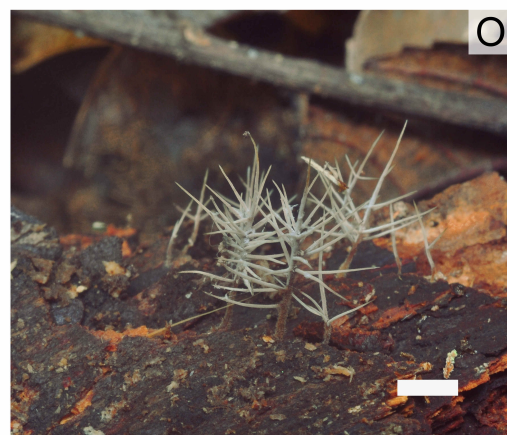

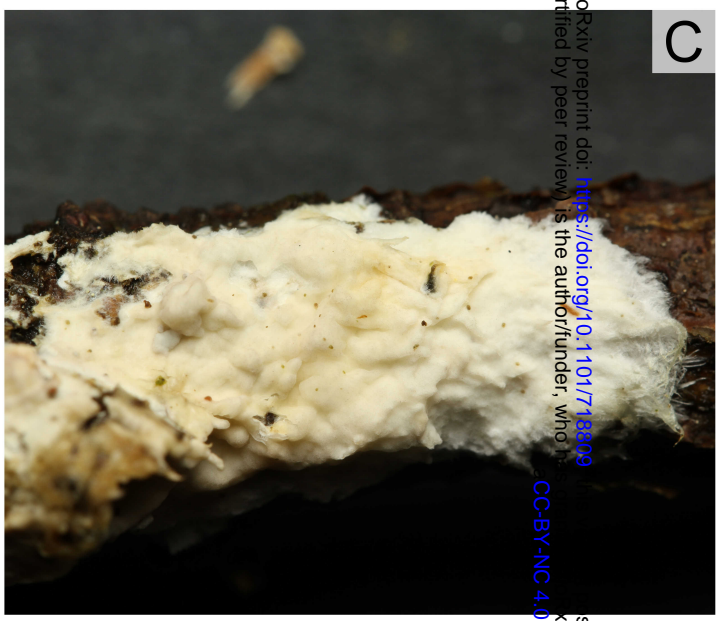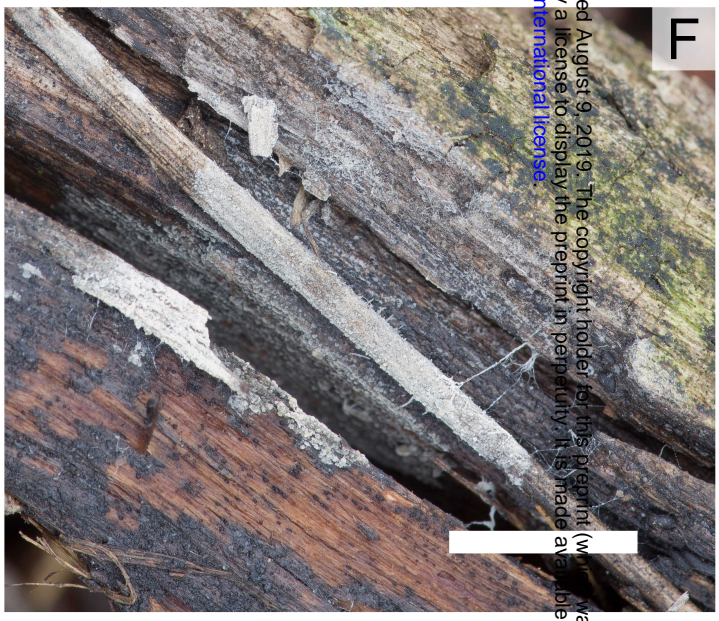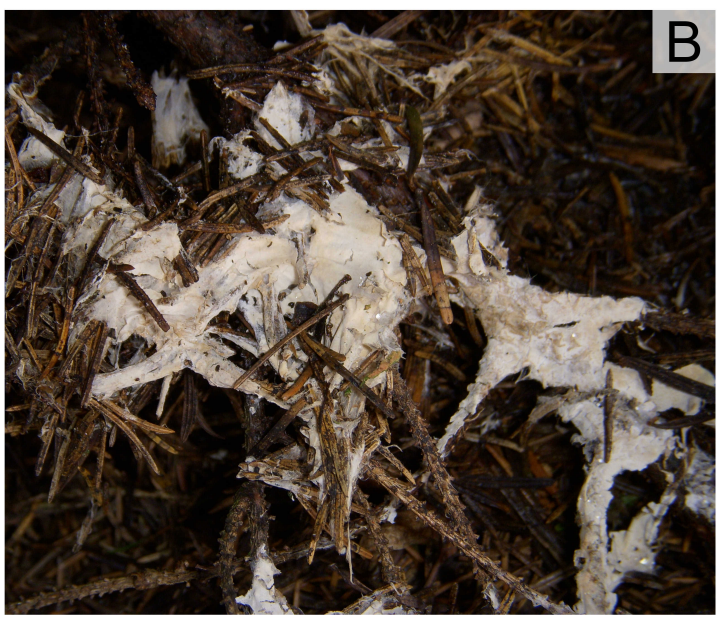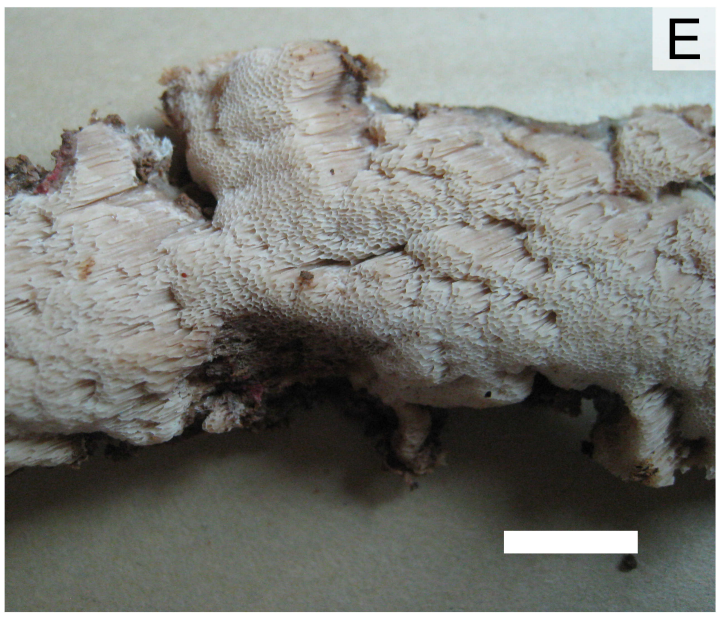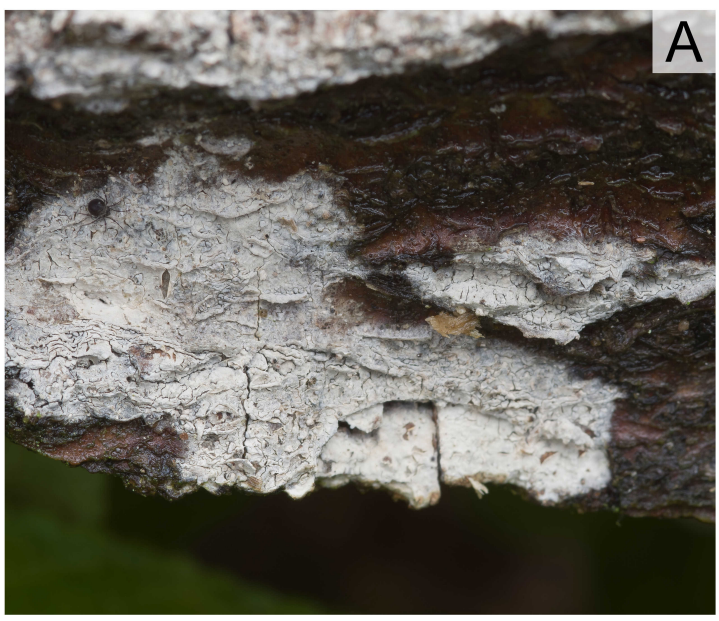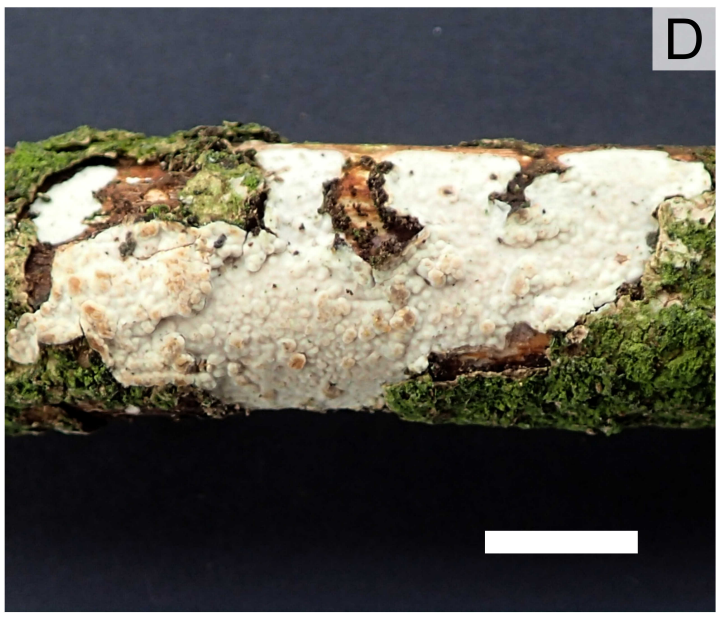

**C**

**F**

**B**

**E**

**A**

**D**

bioRxiv preprint doi: <https://doi.org/10.1101/718809>; this version posted August 9, 2019. The copyright holder for this preprint (which was not certified by peer review) is the author/funder, who has granted bioRxiv a license to display the preprint in perpetuity. It is made available under aCC-BY-NC-ND 4.0 International license.

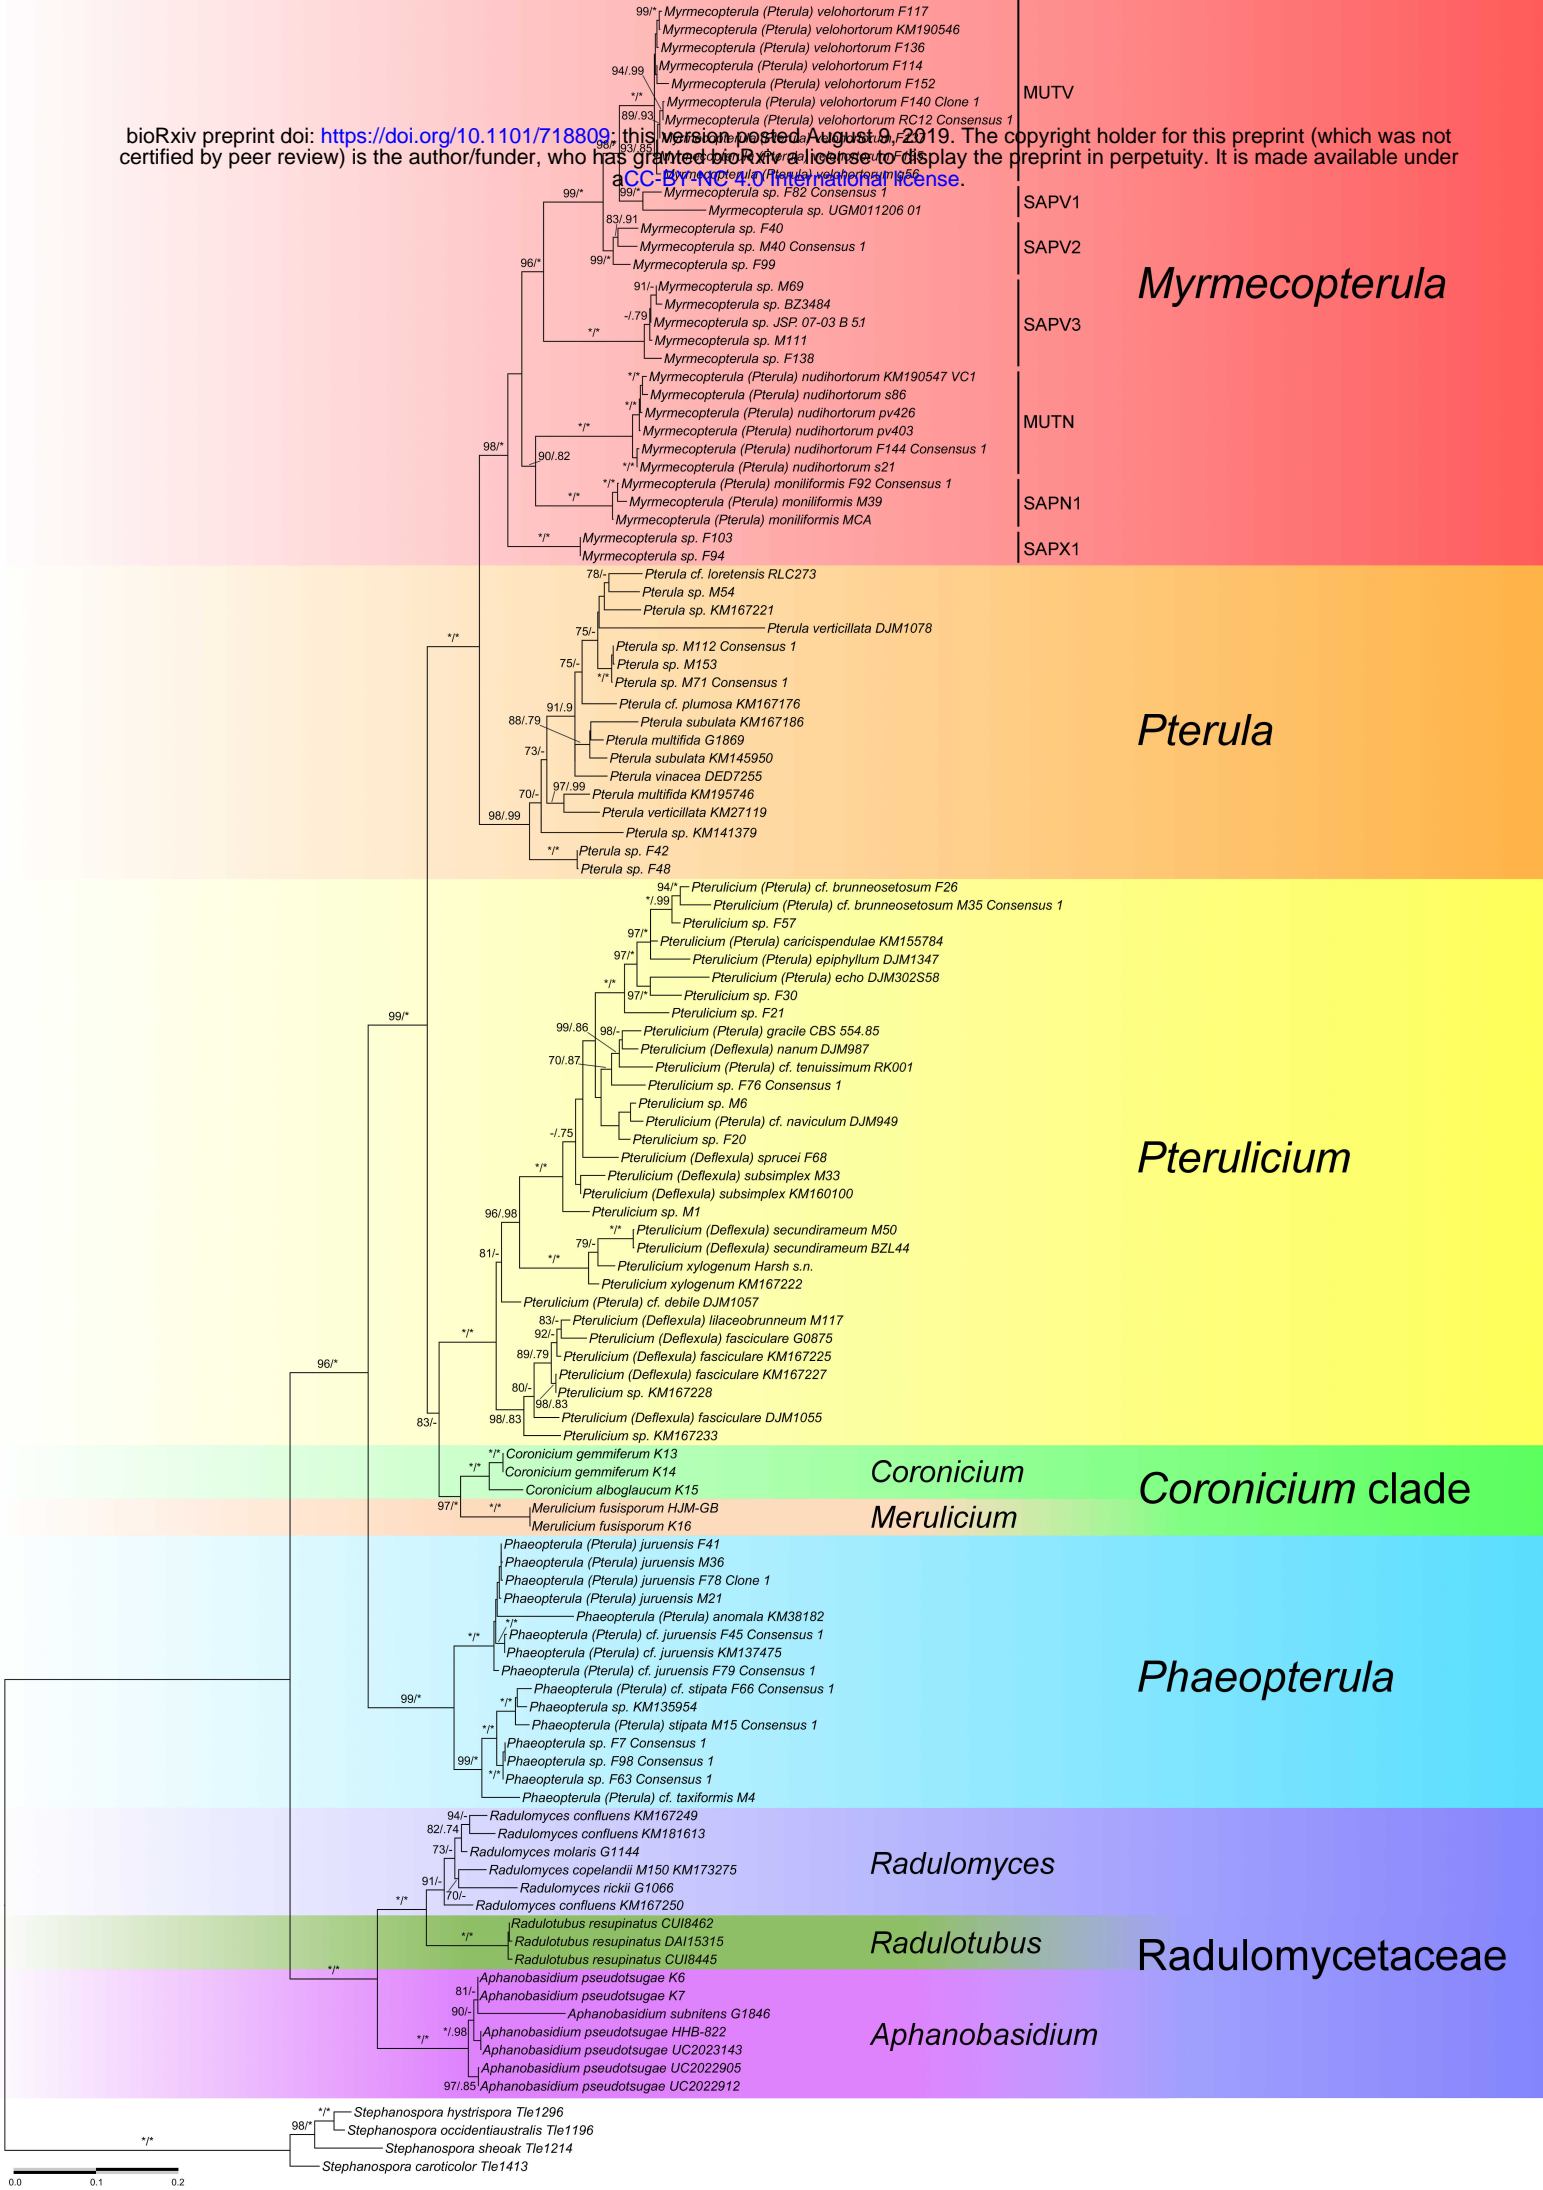

Source: https://www.biorxiv.org/content/biorxiv/early/2019/08/09/718809.full.pdf
