# Supplementary material for: Reclassification of Pterulaceae Corner (Basidiomycota: Agaricales) introducing the ant-associated genus Myrmecopterula gen. nov., Phaeopterula Henn. and the corticioid Radulomycetaceae fam. nov.
Source: bioRxiv or medRxiv preprint supplement (doi:10.1101/718809), 2019-09-27
Supplement: Supplementary file [file media-4.pdf]

## ONLINE RESOURCE 4

### ADDITIONAL NOMENCLATURAL NOVELTIES

#### 1) *Phaeopterula*

***Phaeopterula anomala* (P. Roberts) Leal-Dutra, Dentinger, G.W. Griff., comb. nov.**

MycoBank No: 830999

Basionym

*Pterula anomala* P. Roberts, Kew Bull. 54(3): 528 (1999).

Description in Roberts (1999).

***Phaeopterula hirsuta* (Henn.) Sacc. & D. Sacc.**

MycoBank No: 469044

Basionym

*Pterula hirsuta* Henn., in Warburg, Monunia 1: 9 (1899) [1900]. ≡ *Dendrocladium hirsutum* (Henn.) Lloyd, Mycol. Writ. 5: 870 (1919).

Description in Corner (1950).

***Phaeopterula juruensis* (Henn.) Sacc. & D. Sacc. (Fig. 1O)**

MycoBank No: 634235

Basionym

*Pterula juruensis* Henn. [as '*Phaeopterula juruensis*'], Hedwigia 43(3): 175 (1904). ≡ *Dendrocladium juruense* (Henn.) Lloyd, Mycol. Writ. 5: 870 (1919).

Descriptions in Corner (1950, 1952b).

***Phaeopterula stipata* (Corner) Leal-Dutra, Dentinger, G.W. Griff., comb. nov. (Fig. 1N)**

MycoBank No: 831000

Basionym

*Pterula stipata* Corner, Ann. Bot., Lond., n.s. 16: 568 (1952).

Description in Corner (1952b).

***Phaeopterula taxiformis* (Mont.) Leal-Dutra, Dentinger, G.W. Griff., comb. nov.**

MycoBank No: 831001

Basionym

*Pterula taxiformis* Mont., Syll. gen. sp. crypt. (Paris): 181 (1856). ≡ *Lachnocladium taxiforme* (Mont.) Sacc., Syll. fung. (Abellini) 6: 740 (1888).

= *Pterula humilis* Speg., Revista Argent. Hist. Nat. 1(2): 110 (1891).

= *Pterula humilis* var. *tucumanensis* Speg., Anal. Mus. nac. B. Aires, Ser. 3 12: 280 (1909).

Descriptions in Corner (1950, 1952b).

***Phaeopterula taxiformis* var. *gracilis* (Corner) Leal-Dutra, Dentinger, G.W. Griff., comb. nov.**

MycoBank No: 831002

Basionym

*Pterula taxiformis* var. *gracilis* Corner, Ann. Bot., Lond., n.s. 16: 568 (1952).

Description in Corner (1952b).

#### 2) *Pterulicium*

***Pterulicium argentinum* (Speg.) Leal-Dutra, Dentinger, G.W. Griff., comb. nov.**

Mycobank No: 831003

Basionym

*Mucronella argentina* Speg., Anal. Mus. nac. Hist. nat. B. Aires 6: 178 (1898) [1899]. ≡ *Deflexula argentina* (Speg.) Corner, Ann. Bot., Lond., n.s. 16: 276 (1952).

= *Deflexula lilaceobrunnea* var. *elongata* Corner, Ann. Bot., Lond., n.s. 16: 276 (1952).

Description in Corner (1952a, 1970)

***Pterulicium argentinum* var. *ramosum* (Corner) Leal-Dutra, Dentinger, G.W. Griff., comb. nov.**

Mycobank No: 831004

Basionym

*Deflexula argentina* (Speg.) Corner, Ann. Bot., Lond., n.s. 16: 276 (1952).

Description in Corner (1970).

***Pterulicium bambusae* (Corner) Leal-Dutra, Dentinger, G.W. Griff., comb. nov.**

Mycobank No: 831005

Basionym

*Pterula bambusae* Corner, Beih. Nova Hedwigia 33: 209 (1970).

Description in Corner (1970).

***Pterulicium bromeliphilum* (Corner) Leal-Dutra, Dentinger, G.W. Griff., comb. nov.**

Mycobank No: 831006

Basionym

*Pterula bromeliphila* Corner, Beih. Nova Hedwigia 33: 210 (1970).

Description in Corner (1970).

***Pterulicium brunneosetosum* (Corner) Leal-Dutra, Dentinger, G.W. Griff., comb. nov.**

Mycobank No: 831007

Basionym

*Pterula brunneosetosa* Corner, Ann. Bot., Lond., n.s. 16: 566 (1952)

Descriptions in Corner (1952b, 1957, 1970).

***Pterulicium campoi* (Speg.) Leal-Dutra, Dentinger, G.W. Griff., comb. nov.**

Mycobank No: 831008

Basionym

*Pterula campoi* Speg., Bol. Acad. nac. Cienc. Córdoba 25: 29 (1921).

Descriptions in Corner (1970) and Spegazzini (1921).

***Pterulicium caricis-pendulae* (Corner) Leal-Dutra, Dentinger, G.W. Griff., comb. nov.**

Mycobank No: 831009

Basionym

*Pterula caricis-pendulae* Corner, Beih. Nova Hedwigia 33: 211 (1970).

Description in Corner (1970).

***Pterulicium crassisporum* (P. Roberts) Leal-Dutra, Dentinger, G.W. Griff., comb. nov.**

Mycobank No: 831010

Basionym

*Pterula crassispora* P. Roberts, Kew Bull. 54(3): 531 (1999).

Description in Roberts (1999).

***Pterulicium cystidiatum* (Corner) Leal-Dutra, Dentinger, G.W. Griff., comb. nov.**  
MycoBank No: 831011

Basionym

*Pterula cystidiata* Corner, Ann. Bot., Lond., n.s. 16: 567 (1952).

Description in Corner (1952b).

***Pterulicium debile* (Corner) Leal-Dutra, Dentinger, G.W. Griff., comb. nov.**  
MycoBank No: 831012

Basionym

*Pterula debilis* Corner, Monograph of *Clavaria* and allied Genera, (Annals of Botany Memoirs No. 1): 698 (1950).

Description in (Corner 1950).

***Pterulicium echo* (D.J. McLaughlin & E.G. McLaughlin) Leal-Dutra, Dentinger, G.W. Griff., comb. nov.**  
MycoBank No: 831013

Basionym

*Pterula echo* D.J. McLaughlin & E.G. McLaughlin, Can. J. Bot. 58: 1328 (1980).

Description in McLaughlin and McLaughlin (1980).

***Pterulicium epiphylloides* (Corner) Leal-Dutra, Dentinger, G.W. Griff., comb. nov.**  
MycoBank No: 831014

Basionym

*Pterula epiphylloides* Corner, Ann. Bot., Lond., n.s. 16: 567 (1952).

Description in Corner (1952b).

***Pterulicium epiphyllum* (Corner) Leal-Dutra, Dentinger, G.W. Griff., comb. nov.**  
MycoBank No: 831015

Basionym

*Pterula epiphylla* Corner, Monograph of *Clavaria* and allied Genera, (Annals of Botany Memoirs No. 1): 698 (1950).

Description in (Corner 1950).

***Pterulicium fasciculare* (Bres. & Pat.) Leal-Dutra, Dentinger, G.W. Griff., comb. nov.**  
MycoBank No: 831016

Basionym

*Pterula fascicularis* Bres. & Pat., Mycol. Writ. 1: 50 (1901). ≡ *Deflexula fascicularis* (Bres. & Pat.) Corner, Monograph of *Clavaria* and allied Genera, (Annals of Botany Memoirs No. 1): 395 (1950).

Description in Corner (1950).

***Pterulicium fluminense* (Corner) Leal-Dutra, Dentinger, G.W. Griff., comb. nov.**  
MycoBank No: 831017

Basionym

*Pterula fluminensis* Corner, Ann. Bot., Lond., n.s. 16: 567 (1952).

Descriptions in Corner (1952b, 1970).

***Pterulicium gordium* (Speg.) Leal-Dutra, Dentinger, G.W. Griff., comb. nov.**  
MycoBank No: 831018

Basionym

*Clavaria gordius* Speg., Anal. Soc. cient. argent. 17(2): 83 (1884). ≡ *Pterula gordius* (Speg.) Corner, Monograph of *Clavaria* and allied Genera, (Annals of Botany Memoirs No. 1): 513 (1950).

Description in (Corner 1950).

***Pterulicium gordium* var. *macrosporum* (Corner) Leal-Dutra, Dentinger, G.W. Griff., comb. nov.**

MycoBank No: 831019

Basionym

*Pterula gordius* var. *macrospora* Corner, Proc. Linn. Soc. London 178: 100 (1967).

Description in Corner (1967).

***Pterulicium gracile* (Desm. & Berk.) Leal-Dutra, Dentinger, G.W. Griff., comb. nov.**

MycoBank No: 831020

Basionym

*Typhula gracilis* Desm. & Berk., Ann. nat. Hist., Mag. Zool. Bot. Geol. 1: 202 (1838). ≡ *Pistillaria gracilis* (Desm. & Berk.) Pat., Tab. analyt. Fung. (Paris)(6): 30 (1886). ≡ *Hirsutella gracilis* (Desm. & Berk.) Pat., Revue mycol., Toulouse 14(no. 54): 69 (1892). ≡ *Pterula gracilis* (Desm. & Berk.) Corner, Monograph of *Clavaria* and allied Genera, (Annals of Botany Memoirs No. 1): 514 (1950).  
= *Clavaria aculina* Quél., C. r. Assoc. Franç. Avancem. Sci. 9: 670 (1881) [1880]. ≡ *Pistillaria aculina* (Quél.) Pat., Tab. analyt. Fung. (Paris)(6): 29 (fig. 570) (1886). ≡ *Ceratella aculina* (Quél.) Pat., Hyménomyc. Eur. (Paris): 157 (1887). ≡ *Cnazonaria aculina* (Quél.) Donk, Meded. Bot. Mus. Herb. Rijks Univ. Utrecht 9: 97 (1933).  
= *Pistillaria aculina* subsp. *juncicola* Bourdot & Galzin, Hyménomyc. de France (Sceaux): 138 (1928) [1927].  
= *Pistillaria aculina* subsp. *graminicola* Bourdot & Galzin, Hyménomyc. de France (Sceaux): 139 (1928) [1927].  
= *Pistillaria aculina* subsp. *acicula* Bourdot & Galzin, Hyménomyc. de France (Sceaux): 139 (1928) [1927].  
= *Typhula brunaudii* Quél., C. r. Assoc. Franç. Avancem. Sci. 13: 283 (1885) [1884]. ≡ *Clavaria brunaudii* (Quél.) Sacc., Syll. fung. (Abellini) 6: 730 (1888).  
= *Ceratella ferryi* Quél. & Fautrey, Revue mycol., Toulouse 15(no. 57): 15 (1893). ≡ *Pistillaria ferryi* (Quél. & Fautrey) Sacc., Syll. fung. (Abellini) 11: 141 (1895). ≡ *Pistillaria ferryi* subsp. *tremula* Sacc., Syll. fung. (Abellini) 17: 202 (1905).  
= *Mucronella rickii* Oudem., Ned. kruidk. Archf, 3 sér. 2(3): 667 (1902). ≡ *Cnazonaria rickii* (Oudem.) Donk, Meded. Bot. Mus. Herb. Rijks Univ. Utrecht 9: 99 (1933). ≡ *Ceratellopsis rickii* (Oudem.) Corner, Monograph of *Clavaria* and allied Genera, (Annals of Botany Memoirs No. 1): 205 (1950).

Description in (Corner 1950).

***Pterulicium incarnatum* (Pat.) Leal-Dutra, Dentinger, G.W. Griff., comb. nov.**

MycoBank No: 831021

Basionym

*Pterula incarnata* Pat., in Patouillard & Lagerheim, Bull. Herb. Boissier 3(1): 58 (1895)

Description in (Corner 1950, 1970)

***Pterulicium intermedium* (Dogma) Leal-Dutra, Dentinger, G.W. Griff., comb. nov.**

MycoBank No: 831022

Basionym

*Pterula intermedia* Dogma, Philipp. Agric. 49: 852 (1966)

Descriptions in (Corner 1970) and Dogma (1966)

***Pterulicium laxum* (Pat.) Leal-Dutra, Dentinger, G.W. Griff., comb. nov.**

MycoBank No: 831023

Basionym

*Pterula laxa* Pat., Bull. Soc. mycol. Fr. 18(2): 175 (1902).

Description in (Corner 1950, 1970) Pat. 1902

***Pterulicium lilaceobrunneum* (Corner) Leal-Dutra, Dentinger, G.W. Griff., comb. nov. (Fig. 1K)**  
MycoBank No: 831024

Basionym

*Deflexula lilaceobrunnea* Corner, Monograph of *Clavaria* and allied Genera, (Annals of Botany Memoirs No. 1): 695 (1950).

Description in Corner (1952a).

***Pterulicium lilaceobrunneum* var. *evolutius* (Corner) Leal-Dutra, Dentinger, G.W. Griff., comb. nov.**  
MycoBank No: 831025

Basionym

*Deflexula lilaceobrunnea* var. *evolutior* Corner, Beih. Nova Hedwigia 33: 197 (1970).

Description in Corner (1970).

***Pterulicium longisporum* (Corner) Leal-Dutra, Dentinger, G.W. Griff., comb. nov.**  
MycoBank No: 831026

Basionym

*Pterula longispora* Corner, Ann. Bot., Lond., n.s. 16: 567 (1952)

Description in (Corner 1952b).

***Pterulicium macrosporum* (Pat.) Leal-Dutra, Dentinger, G.W. Griff., comb. nov.**  
MycoBank No: 831027

Basionym

*Ceratella macrospora* Pat., in Patouillard & Lagerheim, Bull. Soc. mycol. Fr. 8(3): 119 (1892). ≡ *Pistillaria macrospora* (Pat.) Sacc., Syll. fung. (Abellini) 11: 142 (1895). ≡ *Pterula macrospora* (Pat.) Corner, Monograph of *Clavaria* and allied Genera, (Annals of Botany Memoirs No. 1): 518 (1950).

Description in (Corner 1950, 1970). Pat 1892

***Pterulicium majus* (Corner) Leal-Dutra, Dentinger, G.W. Griff., comb. nov.**  
MycoBank No: 831028

Basionym

*Deflexula major* Corner, Ann. Bot., Lond., n.s. 16: 277 (1952).

Description in Corner (1952a).

***Pterulicium mangiforme* (Corner) Leal-Dutra, Dentinger, G.W. Griff., comb. nov.**  
MycoBank No: 831029

Basionym

*Deflexula mangiformis* Corner, Ann. Bot., Lond., n.s. 16: 278 (1952).

Description in Corner (1952a).

***Pterulicium microsporum* (Corner) Leal-Dutra, Dentinger, G.W. Griff., comb. nov.**  
MycoBank No: 831030

Basionym

*Deflexula microspora* Corner, Bull. Jard. bot. État Brux. 36: 264 (1966).

Description in Corner (1966).

***Pterulicium nanum* (Pat.) Leal-Dutra, Dentinger, G.W. Griff., comb. nov.**

Mycobank No: 831031

Basionym

*Pterula nana* Pat., Bull. Soc. mycol. Fr. 18(2): 175 (1902). ≡ *Deflexula nana* (Pat.) Corner, Bull. Jard. bot. État Brux. 36: 264 (1966).

= *Pterula vanderystii* Henn. [as 'vanderysti'], Ann. Mus. Congo Belge, Bot., Sér. 5 2(2): 96 (1907). ≡ *Deflexula vanderystii* (Henn.) Corner, Ann. Bot., Lond., n.s. 16: 284 (1952).

Description in Corner (1966).

***Pterulicium naviculum* (Corner) Leal-Dutra, Dentinger, G.W. Griff., comb. nov.**

Mycobank No: 831032

Basionym

*Pterula navicula* Corner, Ann. Bot., Lond., n.s. 16: 568 (1952).

Description in (Corner 1952b).

***Pterulicium oryzae* (Remsberg) Leal-Dutra, Dentinger, G.W. Griff., comb. nov.**

Mycobank No: 831033

Basionym

*Pistillaria oryzae* Remsberg, Mycologia 32(5): 668 (1940). ≡ *Pterula oryzae* (Remsberg) Corner, Monograph of *Clavaria* and allied Genera, (Annals of Botany Memoirs No. 1): 519 (1950).

Descriptions in (Corner 1950) and Remsberg (1940)

***Pterulicium phylloicola* (Corner) Leal-Dutra, Dentinger, G.W. Griff., comb. nov.**

Mycobank No: 831034

Basionym

*Pterula phylloicola* Corner, Beih. Nova Hedwigia 33: 220 (1970).

Description in Corner (1970)

***Pterulicium phyllophilum* (McAlpine) Leal-Dutra, Dentinger, G.W. Griff., comb. nov.**

Mycobank No: 831035

Basionym

*Clavaria phyllophila* McAlpine, Agric. Gaz. N.S.W., Sydney 7: 86 (1896). ≡ *Pterula phyllophila* (McAlpine) Corner, Monograph of *Clavaria* and allied Genera, (Annals of Botany Memoirs No. 1): 520 (1950).

Description in (Corner 1950).

***Pterulicium rigidum* (Donk) Leal-Dutra, Dentinger, G.W. Griff., comb. nov.**

Mycobank No: 831036

Basionym

*Pterula rigida* Donk, Monograph of *Clavaria* and allied Genera, (Annals of Botany Memoirs No. 1): 698 (1950).

Description in Corner (1950)

***Pterulicium sclerotiiicola* (Berthier) Leal-Dutra, Dentinger, G.W. Griff., comb. nov.**

Mycobank No: 831037

Basionym

*Pterula sclerotiiicola* Berthier, Bull. trimest. Soc. mycol. Fr. 83: 731 (1968) [1967]

Description in Corner (1970)

***Pterulicium secundirameum* (Lév) Leal-Dutra, Dentinger, G.W. Griff., comb. nov. (Fig. 11)**

Mycobank No: 831038

Basionym

*Clavaria secundiramea* Lév., Anns Sci. Nat., Bot., sér. 3 2: 216 (1844). ≡ *Pterula secundiramea* (Lév.) Speg., Bol. Acad. nac. Cienc. Córdoba 11(4): 466 (1889). ≡ *Deflexula secundiramea* (Lév.) Corner, Beih. Nova Hedwigia 33: 199 (1970).  
= *Pterula palmicola* Corner, Ann. Bot., Lond., n.s. 16: 568 (1952).

Descriptions in Corner (1950, 1952b).

Notes

The synonymisation of *Pm. palmicola* (samples M50 and M83) in *Pm. secundirameum* (samples M70 and genome5) is based on our phylogenetic results and morphological comparisons. The only morphological difference between the two species is the shape of the basidiome, however, the other characters are similar and both species are nested together within our tree (Online Resource 2).

***Pterulicium sprucei* (Mont.) Leal-Dutra, Dentinger, G.W. Griff., comb. nov. (Fig. 1L)**

MycoBank No: 831039

Basionym

*Hydnum sprucei* Mont., Syll. gen. sp. crypt. (Paris): 173 (1856). ≡ *Pterula sprucei* (Mont.) Lloyd, Mycol. Writ. 5: 865 (1919). ≡ *Deflexula sprucei* (Mont.) Maas Geest., Persoonia 3(2): 179 (1964).  
= *Pterula pennata* Henn., Hedwigia 43(3): 174 (1904). ≡ *Deflexula pennata* (Henn.) Corner, Ann. Bot., Lond., n.s. 16: 278 (1952).

Description in Corner (1952a) as *D. pennata*, Corner (1970) and Maas Geesteranus (1964).

***Pterulicium subsimplex* (Henn.) Leal-Dutra, Dentinger, G.W. Griff., comb. nov.**

MycoBank No: 831040

Basionym

*Pterula subsimplex* Henn., Hedwigia 36(4): 197 (1897). ≡ *Deflexula subsimplex* (Henn.) Corner, Ann. Bot., Lond., n.s. 16: 279 (1952).  
= *Pterula nivea* Pat., Bull. Soc. mycol. Fr. 18(2): 174 (1902). *Deflexula nivea* (Pat.) Corner, Monograph of *Clavaria* and allied Genera, (Annals of Botany Memoirs No. 1): 398 (1950).  
= *Mucronella pacifica* Kobayasi, Bot. Mag., Tokyo 53: 160 (1939). ≡ *Deflexula pacifica* (Kobayasi) Corner, Monograph of *Clavaria* and allied Genera, (Annals of Botany Memoirs No. 1): 399 (1950).

Descriptions in Corner (1952a) and Corner (1950) as *D. pacifica*.

***Pterulicium subsimplex* var. *multifidum* (Corner) Leal-Dutra, Dentinger, G.W. Griff., comb. nov.**

MycoBank No: 831041

Basionym

*Deflexula subsimplex* var. *multifida* Corner, Ann. Bot., Lond., n.s. 16: 282 (1952).

Description in Corner (1952a).

***Pterulicium subtyphuloides* (Corner) Leal-Dutra, Dentinger, G.W. Griff., comb. nov.**

MycoBank No: 831042

Basionym

*Pterula subtyphuloides* Corner, Monograph of *Clavaria* and allied Genera, (Annals of Botany Memoirs No. 1): 698 (1950).

Description in Corner (1950).

***Pterulicium sulcisporum* (Corner) Leal-Dutra, Dentinger, G.W. Griff., comb. nov.**

MycoBank No: 831043

Basionym

*Deflexula sulcispora* Corner, Ann. Bot., Lond., n.s. 16: 283 (1952).

Description in Corner (1952a).

***Pterulicium tenuissimum* (M.A. Curtis) Leal-Dutra, Dentinger, G.W. Griff., comb. nov.**

Mycobank No: 831044

Basionym

*Typhula tenuissima* M.A. Curtis, Am. Journ. Art. Scienc. 6: 351 (1848). ≡ *Pterula tenuissima* (M.A. Curtis) Corner, Monograph of *Clavaria* and allied Genera, (Annals of Botany Memoirs No. 1): 524 (1950).

Description in Corner (1950).

***Pterulicium ulmi* (Peck) Leal-Dutra, Dentinger, G.W. Griff., comb. nov.**

Mycobank No: 831045

Basionym

*Mucronella ulmi* Peck, Ann. Rep. Reg. N.Y. St. Mus. 54: 154 (1902) [1901]. ≡ *Deflexula ulmi* (Peck) Corner, Monograph of *Clavaria* and allied Genera, (Annals of Botany Memoirs No. 1): 400 (1950).

Description in Corner (1950, 1970).

***Pterulicium velutipes* (Corner) Leal-Dutra, Dentinger, G.W. Griff., comb. nov.**

Mycobank No: 831046

Basionym

*Pterula velutipes* Corner, Ann. Bot., Lond., n.s. 16: 569 (1952).

Description in Corner (1952b).
